# Supplementary material for: Pd(ii)/Lewis acid catalyzed regioselective olefination of indole with dioxygen
Source: Royal Society of Chemistry journal article supplement (doi:10.1039/d2ob00006g), 2022-01-01

## Supporting Information for

# Pd(II)/Lewis Acid catalyzed regioselective indole olefination with dioxygen

Chen Tan<sup>†</sup>, Hongwu Jiang<sup>†</sup>, Miao Zeng, Kaiwen Li, Zhuqi Chen, Guochuan Yin

*School of Chemistry and Chemical Engineering, Key laboratory of Material Chemistry for Energy*

*Conversion and Storage (Huazhong University of Science and Technology), Ministry of Education, Hubei Key*

*Laboratory of Material Chemistry and Service Failure, Huazhong University of Science and Technology,*

*Wuhan 430074, PR China.*

*E-mail: [gyin@hust.edu.cn](mailto:gyin@hust.edu.cn)*

## Content

1. Optimizations of the reaction conditions S2
2. <sup>1</sup>H NMR kinetics of the reaction between *N,N,5*-trimethyl-*1H*-indole-1-carboxamide and 4-methylstyrene in the presence of one equivalent Pd(OAc)<sub>2</sub> S6
3. <sup>1</sup>H NMR kinetics of the reaction between *N,N,5*-trimethyl-*1H*-indole-1-carboxamide and 4-methylstyrene in the presence of one equivalent Pd(OAc)<sub>2</sub>/Sc(OTf)<sub>3</sub> S7
4. The second-order kinetics of the reaction between *N,N,5*-trimethyl-*1H*-indole-1-carboxamide and 4-methylstyrene monitored by <sup>1</sup>H NMR S8
5. TLC kinetics of the reaction between *N,N,5*-trimethyl-*1H*-indole-1-carboxamide and methyl acrylate catalyzed by Pd(OAc)<sub>2</sub> or Pd(OAc)<sub>2</sub>/Sc(OTf)<sub>3</sub> S9
6. <sup>1</sup>H NMR kinetics of the reaction between *N,N,5*-trimethyl-*1H*-indole-1-carboxamide and methyl acrylate in the presence of one equivalent Pd(OAc)<sub>2</sub> S10
7. <sup>1</sup>H NMR kinetics of the reaction between *N,N,5*-trimethyl-*1H*-indole-1-carboxamide and methyl acrylate in the presence of one equivalent Pd(OAc)<sub>2</sub>/Sc(OTf)<sub>3</sub> S11
8. The second order kinetics of the reaction between *N,N,5*-trimethyl-*1H*-indole-1-carboxamide and methyl acrylate monitored by <sup>1</sup>H NMR S12
9. UV-vis spectra of the catalyst in DMSO S13
10. <sup>1</sup>H NMR and <sup>13</sup>C NMR spectra of all compounds S15

## 1. Optimizations of the reaction conditions

**Table S1. Optimization of the reaction conditions for the indole olefination reaction <sup>a</sup>**

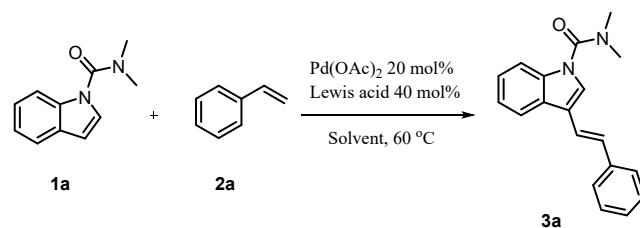

| Entry | Catalyst             | Lewis acid           | Solvent              | Yield (%) <sup>b</sup> |
|-------|----------------------|----------------------|----------------------|------------------------|
| 1     | Pd(OAc) <sub>2</sub> | -                    | DMSO                 | 16                     |
| 2     | Pd(OAc) <sub>2</sub> | NaOTf                | DMSO                 | 10                     |
| 3     | Pd(OAc) <sub>2</sub> | Ca(OTf) <sub>2</sub> | DMSO                 | 28                     |
| 4     | Pd(OAc) <sub>2</sub> | Zn(OTf) <sub>2</sub> | DMSO                 | 35                     |
| 5     | Pd(OAc) <sub>2</sub> | Cu(OTf) <sub>2</sub> | DMSO                 | 40                     |
| 6     | Pd(OAc) <sub>2</sub> | Cu(OAc) <sub>2</sub> | DMSO                 | 35                     |
| 7     | Pd(OAc) <sub>2</sub> | Al(OTf) <sub>3</sub> | DMSO                 | 50                     |
| 8     | Pd(OAc) <sub>2</sub> | Yb(OTf) <sub>3</sub> | DMSO                 | 63                     |
| 9     | Pd(OAc) <sub>2</sub> | Y(OTf) <sub>3</sub>  | DMSO                 | 65                     |
| 10    | Pd(OAc) <sub>2</sub> | Sc(OTf) <sub>3</sub> | DMSO                 | 75                     |
| 11    | Pd(OAc) <sub>2</sub> | Sc(OAc) <sub>3</sub> | DMSO                 | 45                     |
| 12    | Pd(OAc) <sub>2</sub> | ScF <sub>3</sub>     | DMSO                 | 64                     |
| 13    | Pd(OAc) <sub>2</sub> | Sc(OTf) <sub>3</sub> | DMF                  | 31                     |
| 14    | Pd(OAc) <sub>2</sub> | Sc(OTf) <sub>3</sub> | MeCN                 | n.d.                   |
| 15    | Pd(OAc) <sub>2</sub> | Sc(OTf) <sub>3</sub> | CH <sub>3</sub> COOH | n.d.                   |
| 16    | Pd(OAc) <sub>2</sub> | Sc(OTf) <sub>3</sub> | Dioxane              | n.d.                   |
| 17    | -                    | Sc(OTf) <sub>3</sub> | DMSO                 | n.d.                   |

<sup>a</sup>Reaction conditions: solvent (1.0 mL), **1a** (0.2 mmol), **2a** (0.4 mmol), Pd(OAc)<sub>2</sub> (20 mol%), Lewis acid (40 mol%),

O<sub>2</sub> balloon, 60 °C, 24 h. <sup>b</sup> Isolated yield.

**Table S2. Ratio and amount of the catalyst loadings for the indole olefination reaction <sup>a</sup>**

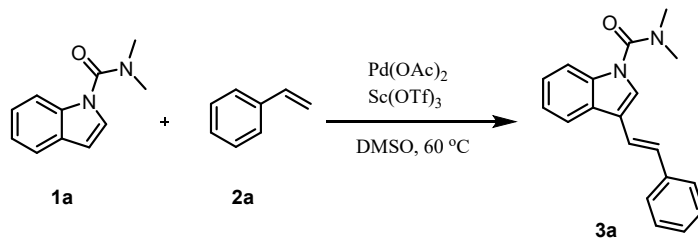

| Entry | Pd(OAc) <sub>2</sub> :Sc(OTf) <sub>3</sub> (mol%) | Yield (%) <sup>b</sup> |
|-------|---------------------------------------------------|------------------------|
| 1     | 10:20                                             | 54                     |
| 2     | 15:30                                             | 60                     |
| 3     | 20:40                                             | 75                     |
| 4     | 20:20                                             | 63                     |

<sup>a</sup>Reaction conditions: DMSO (1.0 mL), **1a** (0.2 mmol), **2a** (0.4 mmol), Pd(OAc)<sub>2</sub> (10-20 mol%), Sc(OTf)<sub>3</sub> (20-40 mol%), O<sub>2</sub> balloon, 60 °C, 24 h. <sup>b</sup> Isolated yield.

**Table S3. The influence of reaction temperature for the indole olefination reaction**

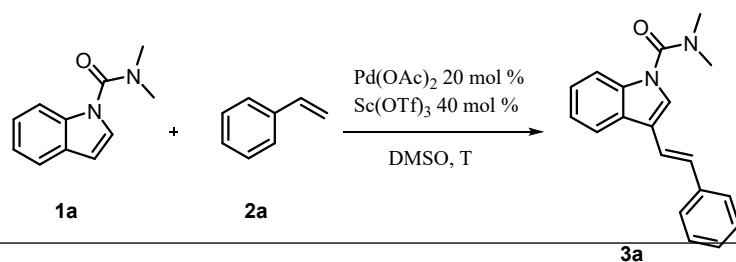

| Entry | Catalyst       | Solvent | T (°C) | Time (h) | Yield (%) |
|-------|----------------|---------|--------|----------|-----------|
| 1     | Pd(II)/Sc(III) | DMSO    | 50     | 24       | 35        |
| 2     |                |         | 60     |          | 75        |
| 3     |                |         | 70     |          | 60        |
| 4     |                |         | 80     |          | 54        |

<sup>a</sup> Reaction conditions: **1a** (0.2 mmol), **2a** (0.4 mmol), Pd(OAc)<sub>2</sub> (20 mol %), Sc(OTf)<sub>3</sub> (40 mol %), O<sub>2</sub> balloon. <sup>b</sup> Isolated yield.

**Table S4. Control experiments for the indole olefination reaction <sup>a</sup>**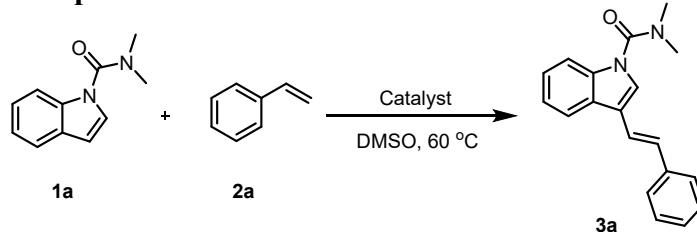

| Entry | Catalyst                                   | Yield (%) <sup>b</sup> |
|-------|--------------------------------------------|------------------------|
| 1     | Pd(OAc) <sub>2</sub>                       | 16                     |
| 2     | Sc(OTf) <sub>3</sub>                       | n.d.                   |
| 3     | Pd(OAc) <sub>2</sub> +Sc(OTf) <sub>3</sub> | 75                     |
| 4     | Pd(OAc) <sub>2</sub> +HOTf (120 mol%)      | 11                     |
| 5     | Pd(OTf) <sub>2</sub>                       | n.d.                   |

<sup>a</sup>Reaction conditions: DMSO (1.0 mL), **1a** (0.2 mmol), **2a** (0.4 mmol), Pd(OAc)<sub>2</sub> (10-20 mol%), Sc(OTf)<sub>3</sub> (20-40 mol%), O<sub>2</sub> balloon, 60 °C, 24 h. <sup>b</sup> Isolated yield.

2.  $^1\text{H}$  NMR kinetic studies of the reaction between *N,N*,5-trimethyl-1*H*-indole-1-carboxamide and 4-methylstyrene in the presence of one equivalent  $\text{Pd}(\text{OAc})_2$

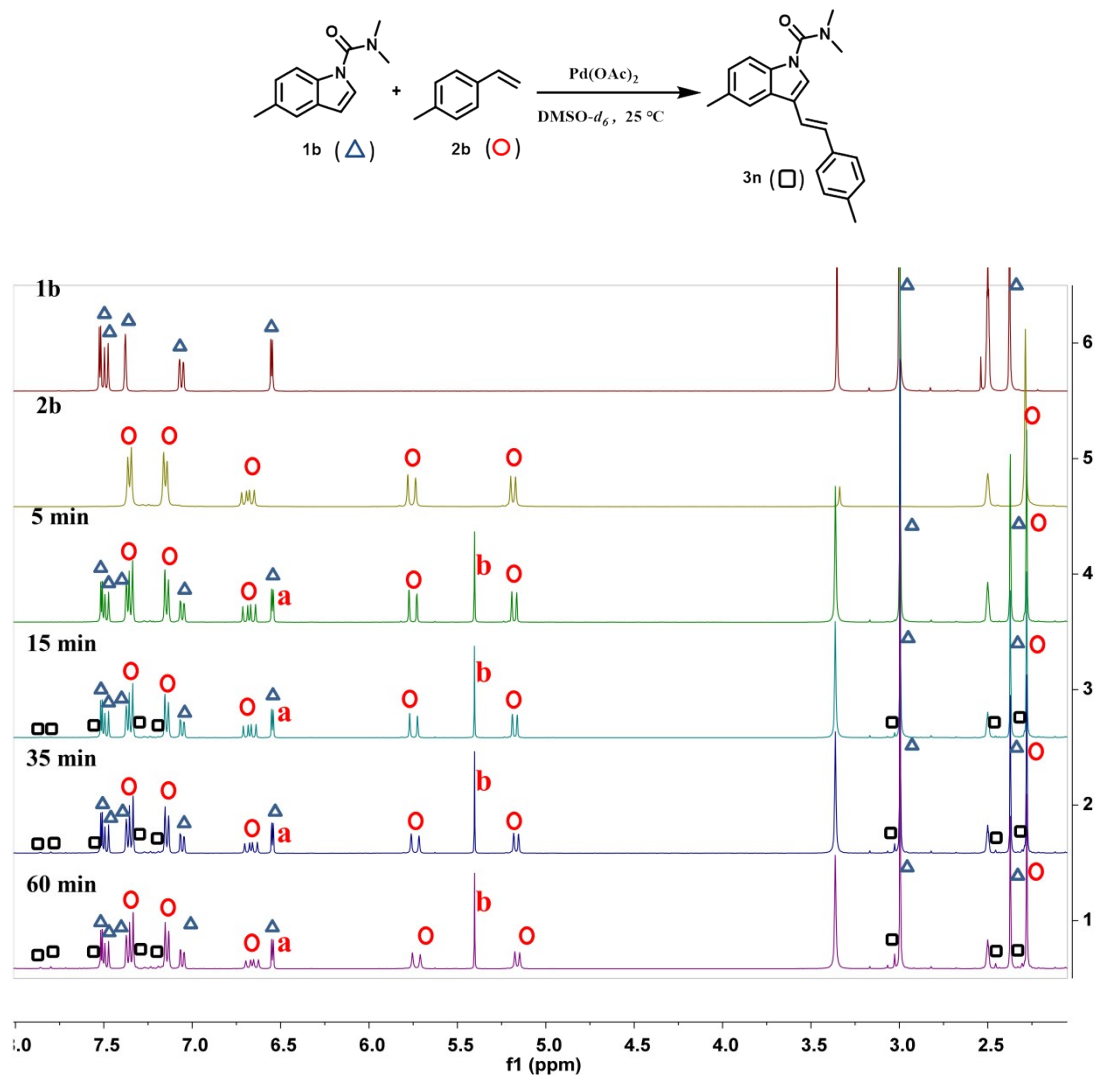

**Fig. S1**  $^1\text{H}$  NMR kinetics of **1b** (0.05 mmol) with **2b** (0.05 mmol) in  $\text{DMSO-}d_6$  (0.6 mL) in the presence of one equivalent  $\text{Pd}(\text{OAc})_2$  at room temperature with  $\text{CH}_2\text{Br}_2$  (0.025mmol) as the internal stanard.

3.  $^1\text{H}$  NMR kinetic studies of the reaction between *N,N,5*-trimethyl-1*H*-indole-1-carboxamide and 4-methylstyrene in the presence of one equivalent  $\text{Pd}(\text{OAc})_2/\text{Sc}(\text{OTf})_3$

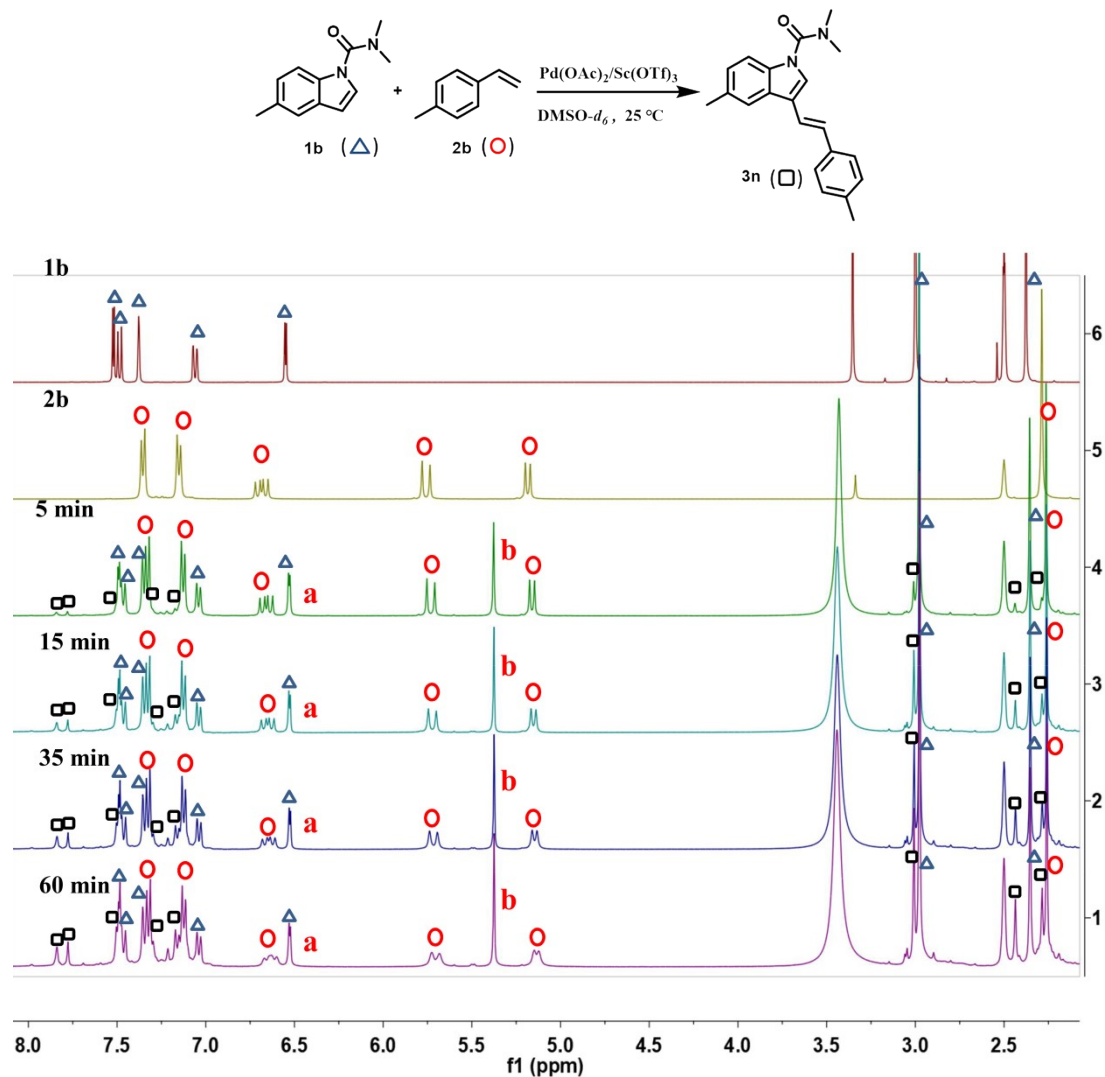

Fig. S2  $^1\text{H}$  NMR kinetics of **1b** (0.05mmol) with **2b** (0.05 mmol) in  $\text{DMSO}-d_6$  (0.6 mL) in the presence of one equivalent  $\text{Pd}(\text{OAc})_2/\text{Sc}(\text{OTf})_3$  at room temperature with  $\text{CH}_2\text{Br}_2$  (0.025mmol) as the internal stanard.

**4. The second-order kinetics of the olefination reaction between *N,N*,5-trimethyl-1*H*-indole-1-carboxamide and 4-methylstyrene monitored by <sup>1</sup>H NMR spectroscopy**

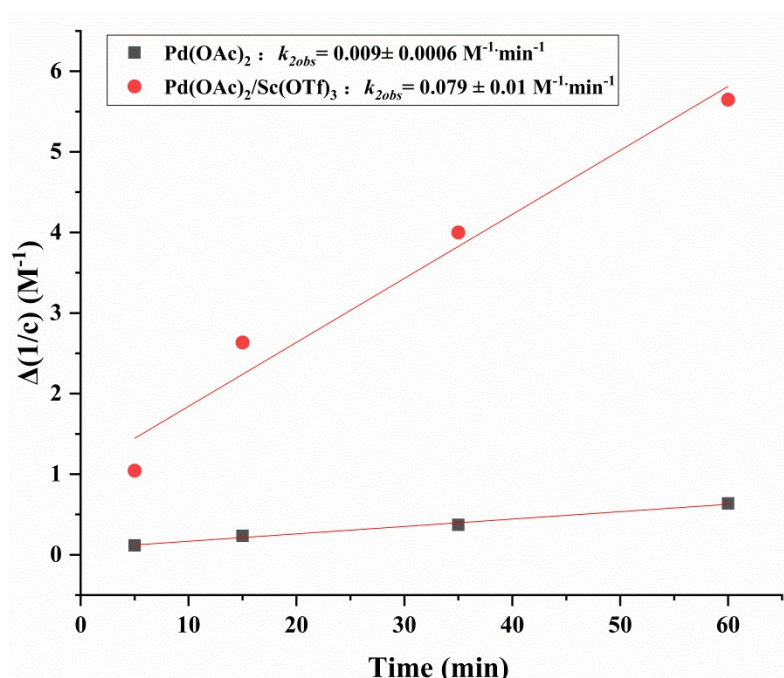

**Fig. S3** The second order kinetics of the olefination reaction between **1b** (*N,N*,5-trimethyl-1*H*-indole-1-carboxamide) and substrate **2b** (4-methylstyrene),  $\Delta(1/c) = 1/(0.083-c) - 1/0.083$ .

The kinetic calculations were carried out following the equations as below, where **a** is the initial concentration of **1b**, **y** is the conversion rate of **1b**, **t** is the reaction time, **1b** and **2b** have the identically initial concentrations:

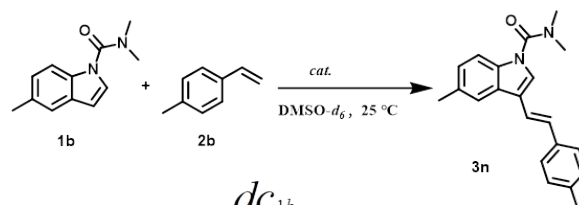

$$r = -\frac{dc_{1b}}{dt} = k_{2obs} \cdot c_{1b}^2$$

$$\Rightarrow \frac{1}{c_{1b(t)}} - \frac{1}{c_{1b(t_0)}} = k_{2obs} \cdot t$$

$$\Rightarrow \frac{1}{a(1-y)} - \frac{1}{a} = k_{2obs} \cdot t$$



5. TLC kinetic observation of the reaction between *N,N*,5-trimethyl-1*H*-indole-1-carboxamide and methyl acrylate catalyzed by Pd(OAc)<sub>2</sub> (point 1) and Pd(OAc)<sub>2</sub>/Sc(OTf)<sub>3</sub> (point 2) with dioxygen balloon

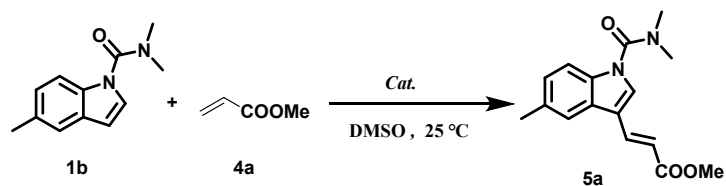

Reaction time (min) 5 10 15 30 45 60 120 180 720

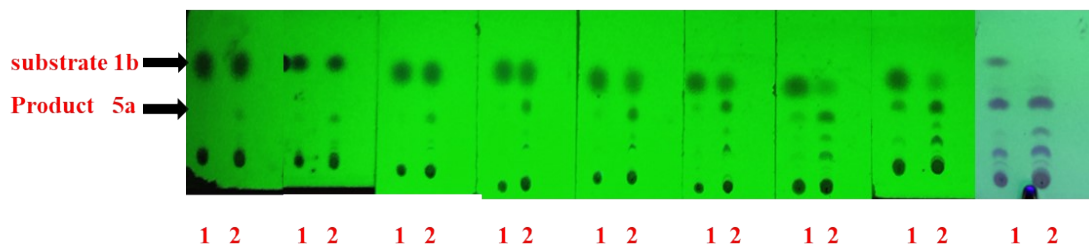

**Fig. S4** Reaction conditions: *N,N*,5-trimethyl-1*H*-indole-1-carboxamide **1b** (0.05 mmol), methyl acrylate **4a** (0.05 mmol), Pd(OAc)<sub>2</sub> (0.05 mmol), Sc(OTf)<sub>3</sub> (0.05 mol), DMSO-*d*<sub>6</sub> (0.6mL), O<sub>2</sub> balloon, 25 °C.

6.  $^1\text{H}$  NMR kinetics of the reaction between *N,N*,5-trimethyl-1*H*-indole-1-carboxamide and methyl acrylate in the presence of one equivalent  $\text{Pd}(\text{OAc})_2$

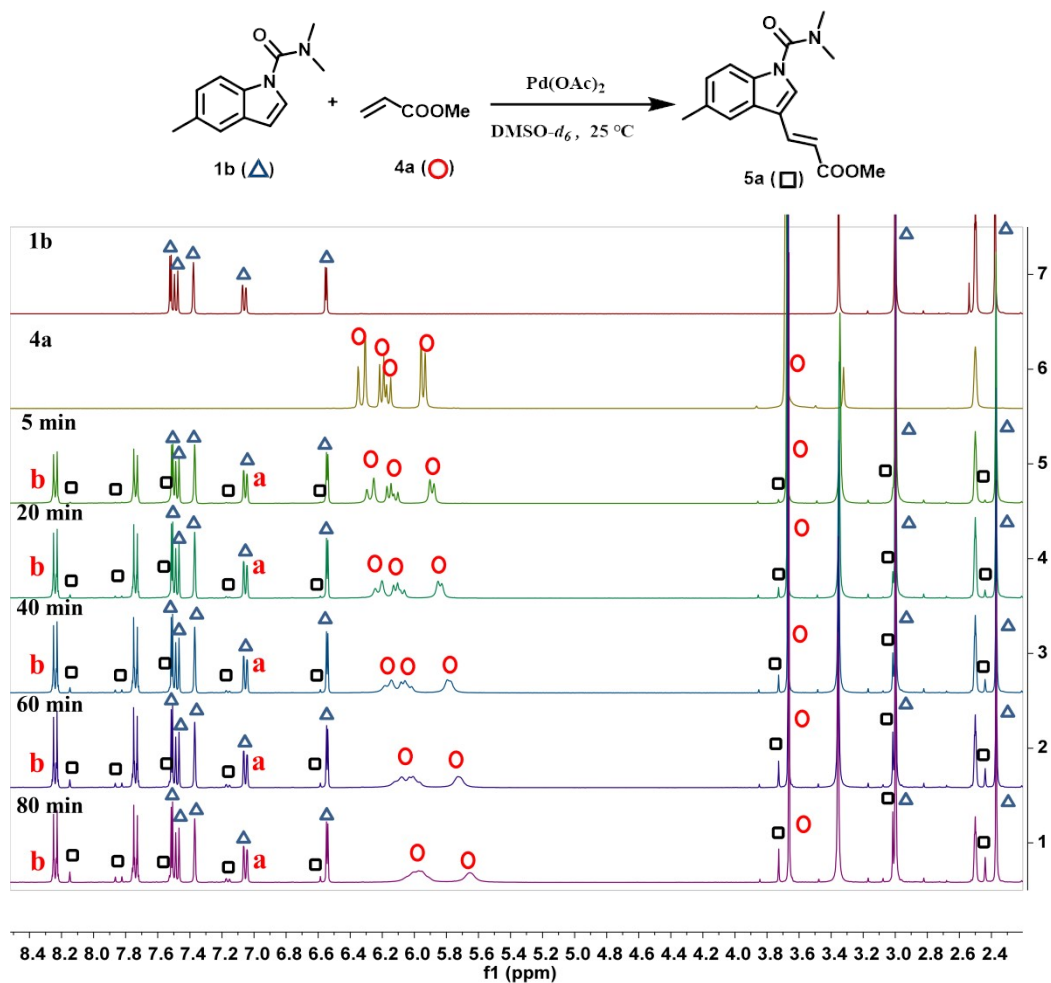

**Fig. S5**  $^1\text{H}$  NMR kinetics of **1b** (0.05mmol) with **4a** (0.05 mmol) in  $\text{DMSO-}d_6$  (0.6 mL) in the presence of one equivalent  $\text{Pd}(\text{OAc})_2$  at room temperature with 4-chloronitrobenzene (0.025mmol) as the internal standard.

7.  $^1\text{H}$  NMR kinetics of the reaction between *N,N*,5-trimethyl-1*H*-indole-1-carboxamide and Methyl acrylate in the presence of one equivalent  $\text{Pd}(\text{OAc})_2/\text{Sc}(\text{OTf})_3$

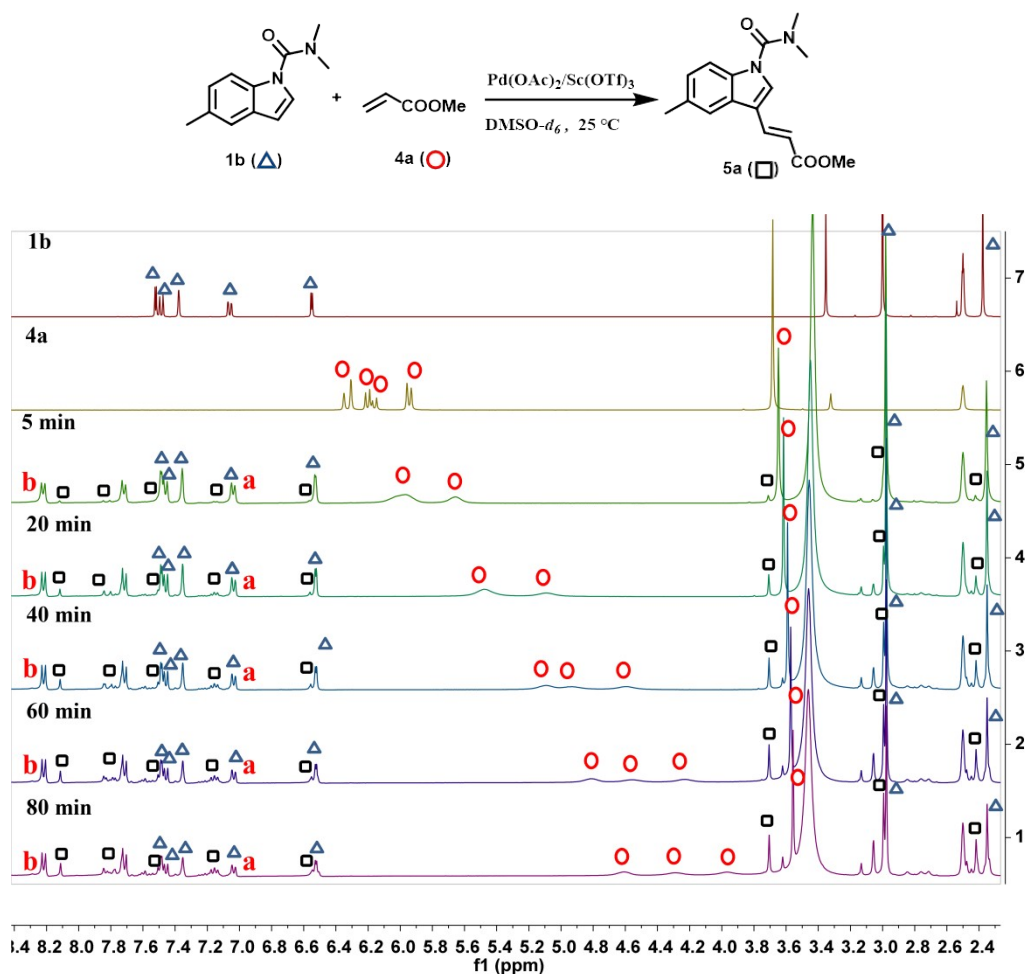

**Fig. S6**  $^1\text{H}$  NMR kinetics of **1b** (0.05 mmol) with **4a** (0.05 mmol) in  $\text{DMSO-}d_6$  (0.6 mL) in the presence of one equivalent  $\text{Pd}(\text{OAc})_2/\text{Sc}(\text{OTf})_3$  at room temperature with 4-chloronitrobenzene (0.025 mmol) as the internal standard.

8. The second-order kinetics of the olefination reaction between of *N,N*,5-trimethyl-1*H*-indole-1-carboxamide and methyl acrylate

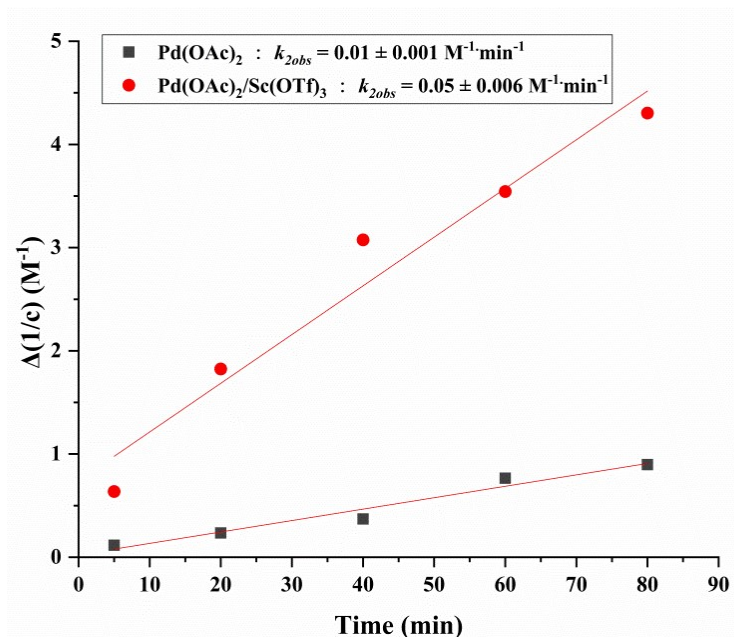

**Fig. S7** The second order kinetics of the olefination reaction between **1b** and **4a** monitored by <sup>1</sup>H NMR spectroscopy,  $\Delta(1/c) = 1/(0.083-c) - 1/0.083$ .

The kinetic calculations were carried out following the equations as below, where **a** is the initial concentration of **1b**, **y** is the conversion rate of **1b**, **t** is the reaction time, **1b** and **4a** have the identically initial concentrations:

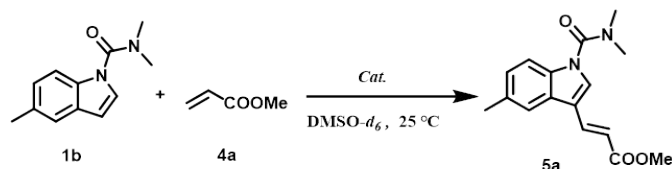

$$r = -\frac{dc_{1b}}{dt} = k_{2obs} \cdot c_{1b}^2$$

$$\Rightarrow \frac{1}{c_{1b(t)}} - \frac{1}{c_{1b(t_0)}} = k_{2obs} \cdot t$$

$$\Rightarrow \frac{1}{a(1-y)} - \frac{1}{a} = k_{2obs} \cdot t$$

## 9. UV-vis spectra of the catalyst in DMSO

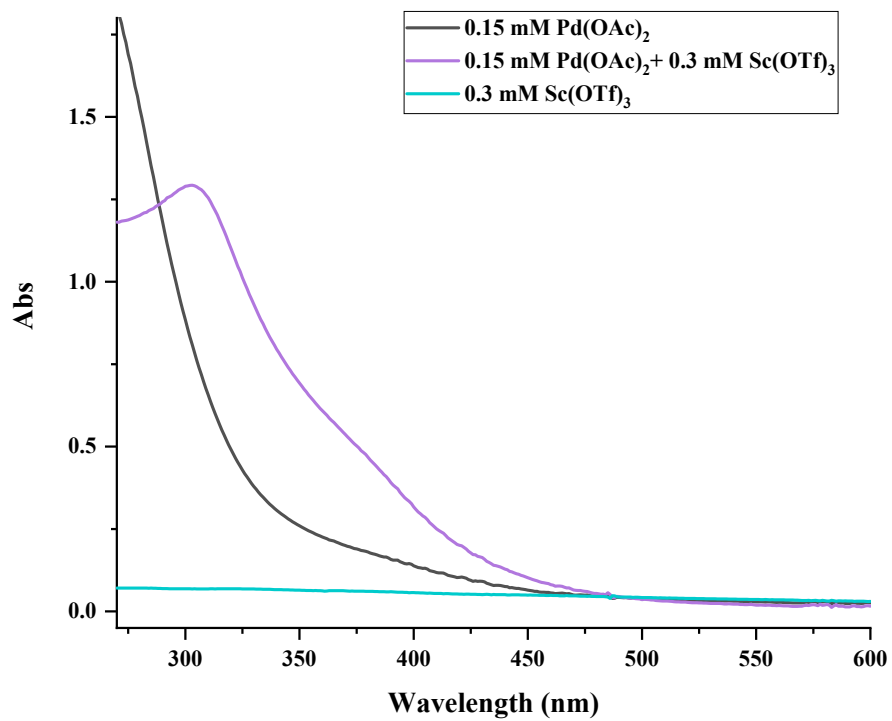

Fig. S8 UV-vis spectra of Pd(OAc)<sub>2</sub> and Sc(OTf)<sub>3</sub> in DMSO.

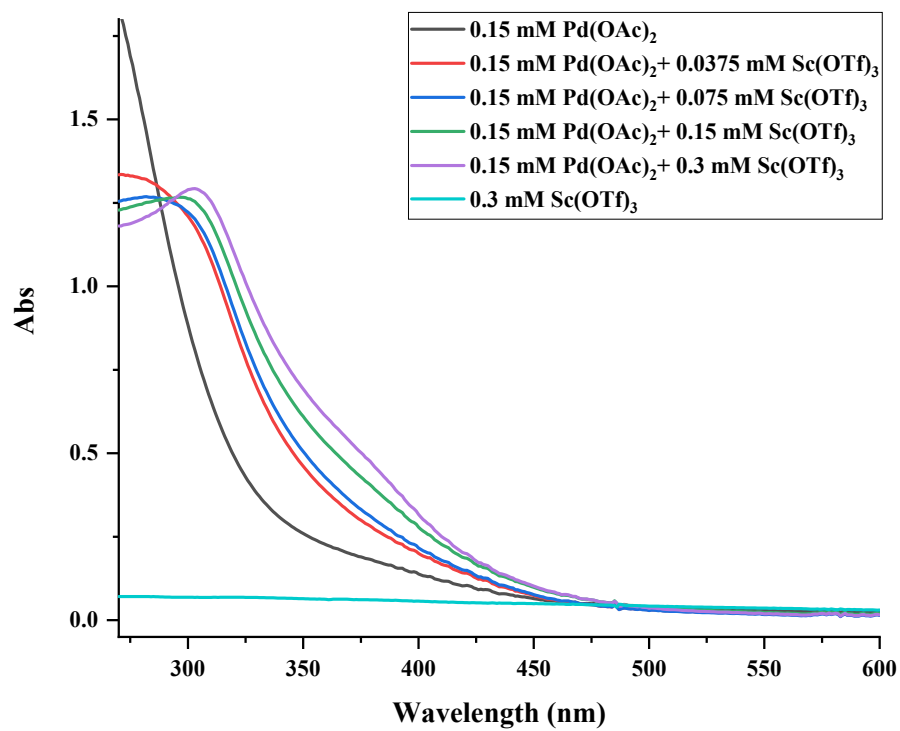

**Fig. S9** UV-vis spectra of the Pd(II)/Sc(III) catalyst in DMSO. Conditions: 0.15 mM Pd(II), 0-0.3 mM Sc(III), room temperature.

## 10. $^1\text{H}$ NMR and $^{13}\text{C}$ NMR spectra of all compounds

$^1\text{H}$  NMR Spectrum (400 MHz,  $\text{DMSO-}d_6$ ) of **1a**

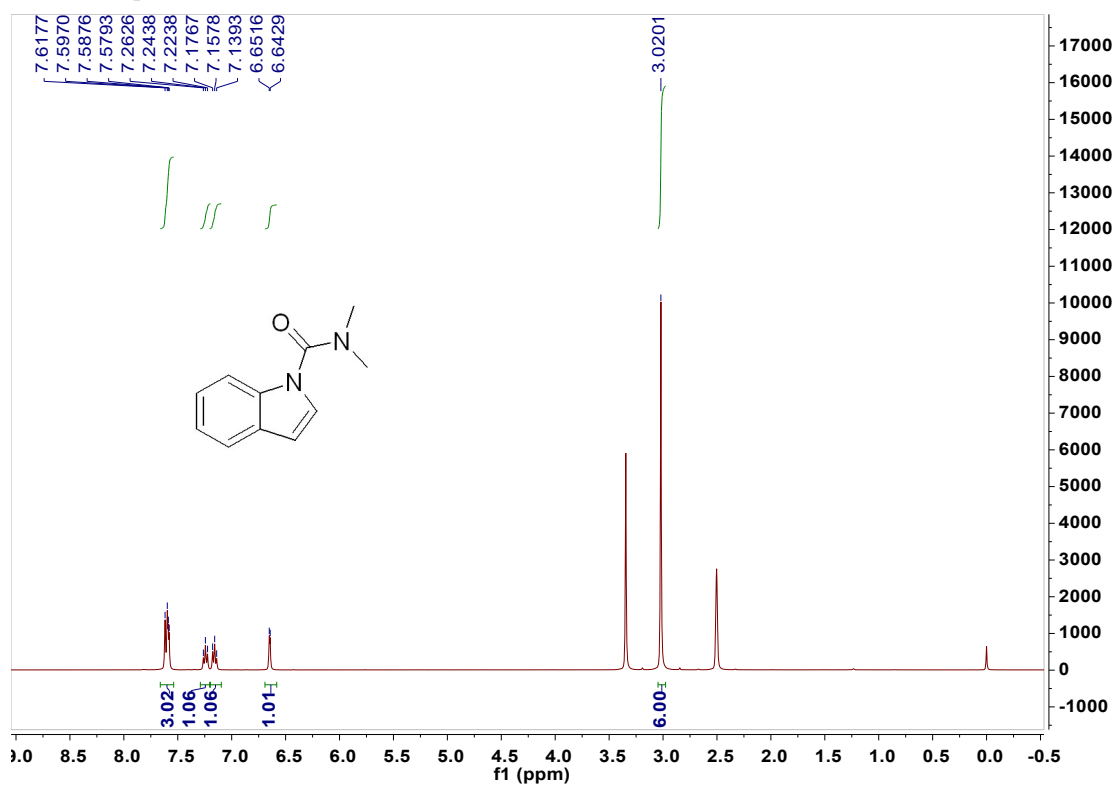

$^1\text{H}$  NMR Spectrum (400 MHz,  $\text{DMSO-}d_6$ ) of **1b**

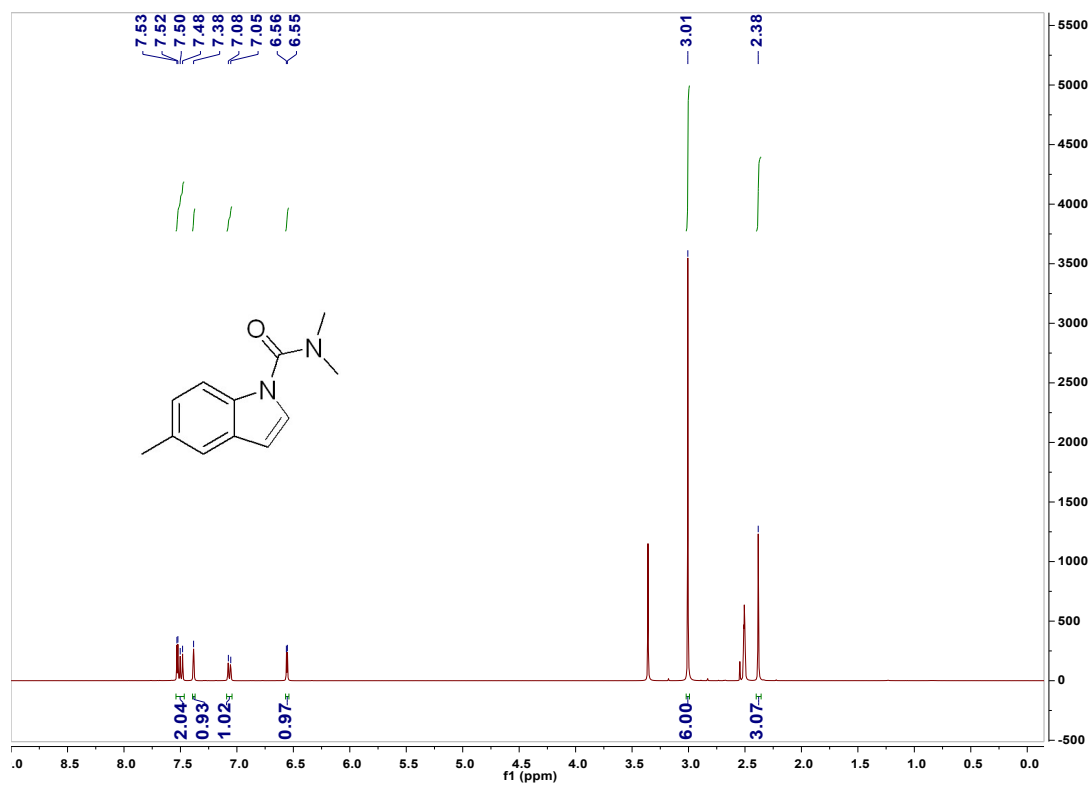

<sup>1</sup>H NMR Spectrum (400 MHz, DMSO-*d*<sub>6</sub>) of **1c**

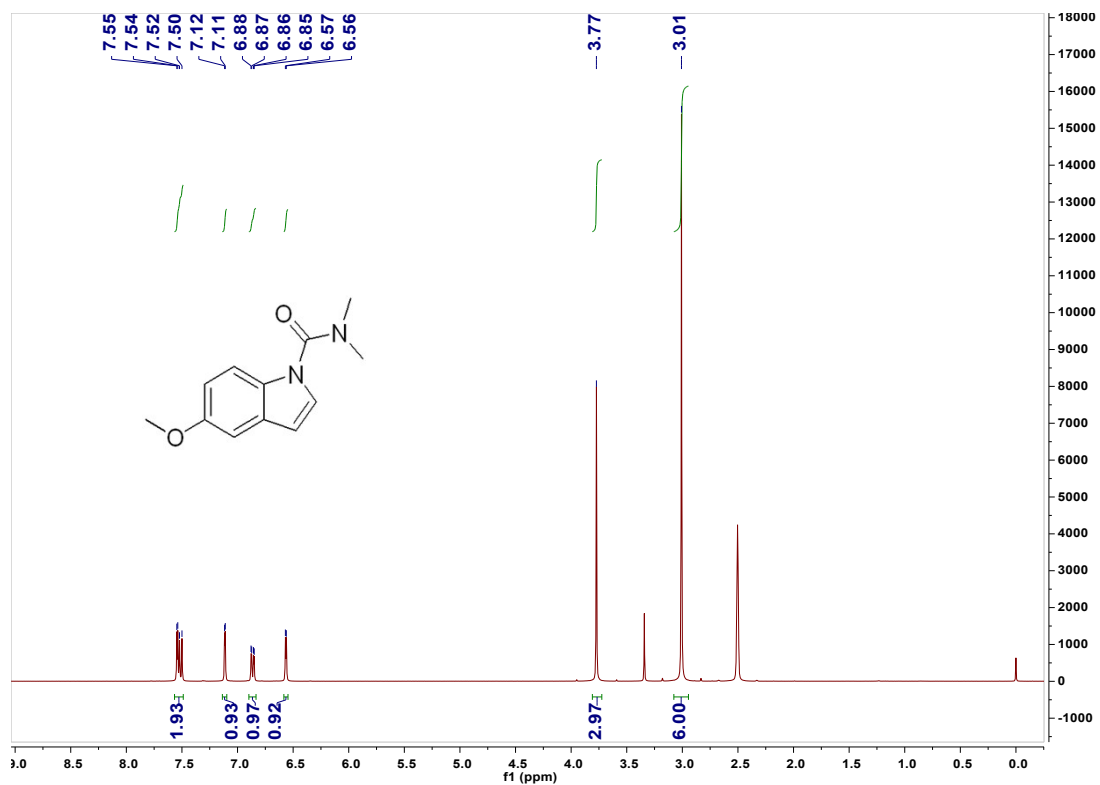

<sup>1</sup>H NMR Spectrum (400 MHz, DMSO-*d*<sub>6</sub>) of **1d**

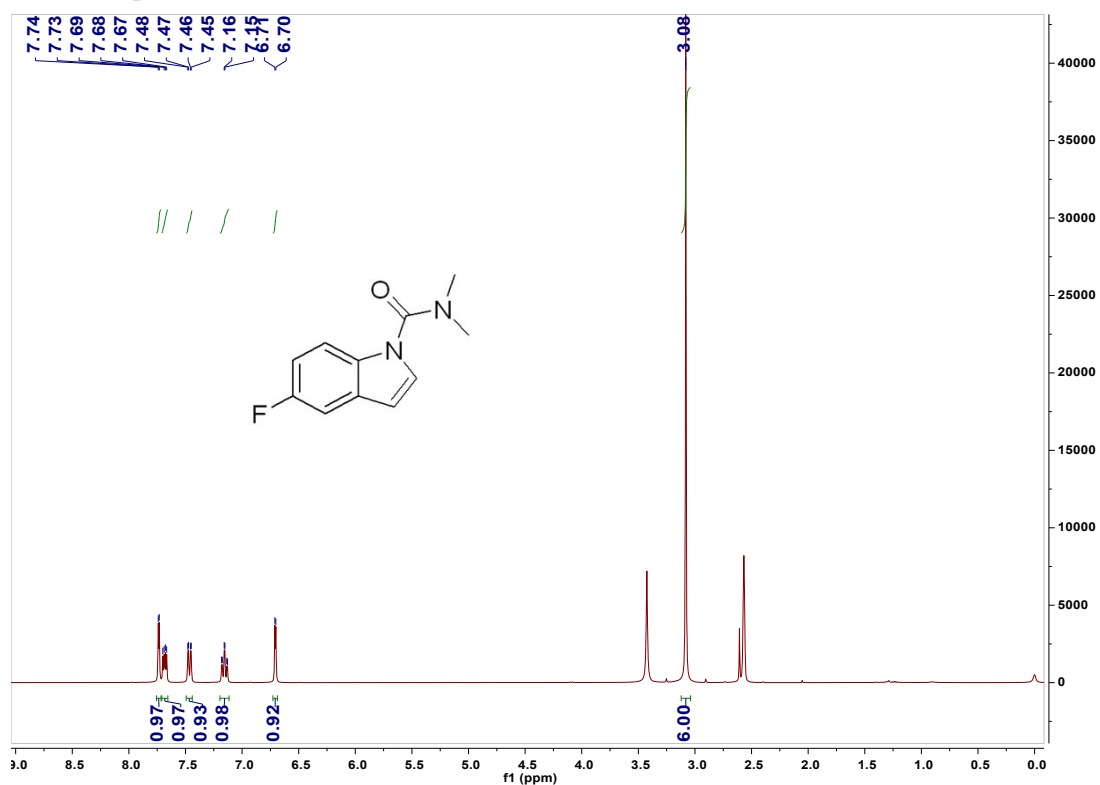



<sup>1</sup>H NMR Spectrum (400 MHz, DMSO-*d*<sub>6</sub>) of **1e**

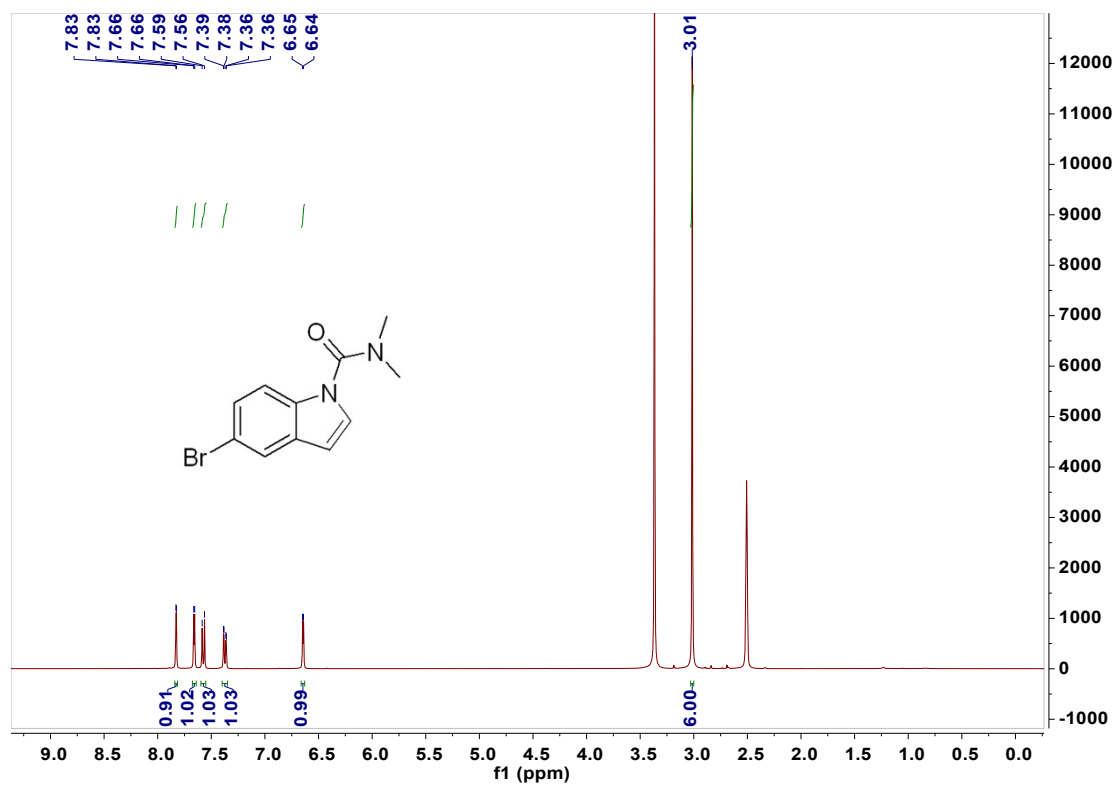

<sup>1</sup>H NMR Spectrum (400 MHz, DMSO-*d*<sub>6</sub>) of **1f**

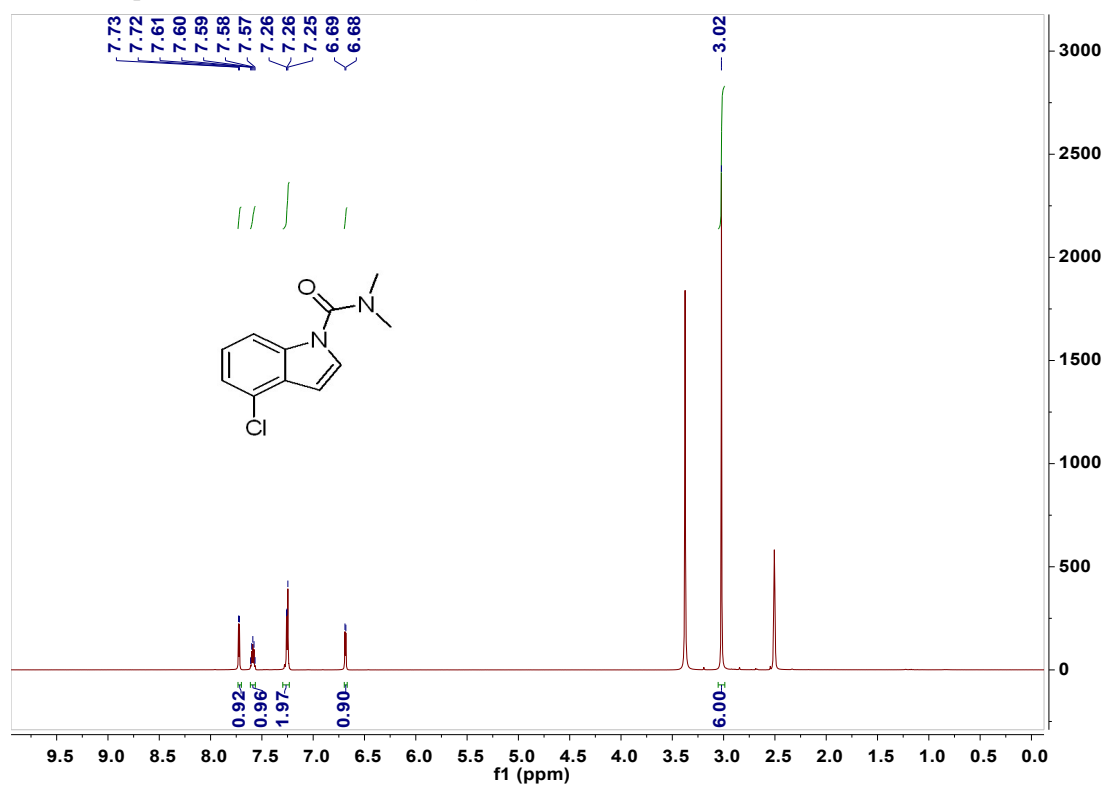

<sup>1</sup>H NMR Spectrum (400 MHz, DMSO-*d*<sub>6</sub>) of **1g**

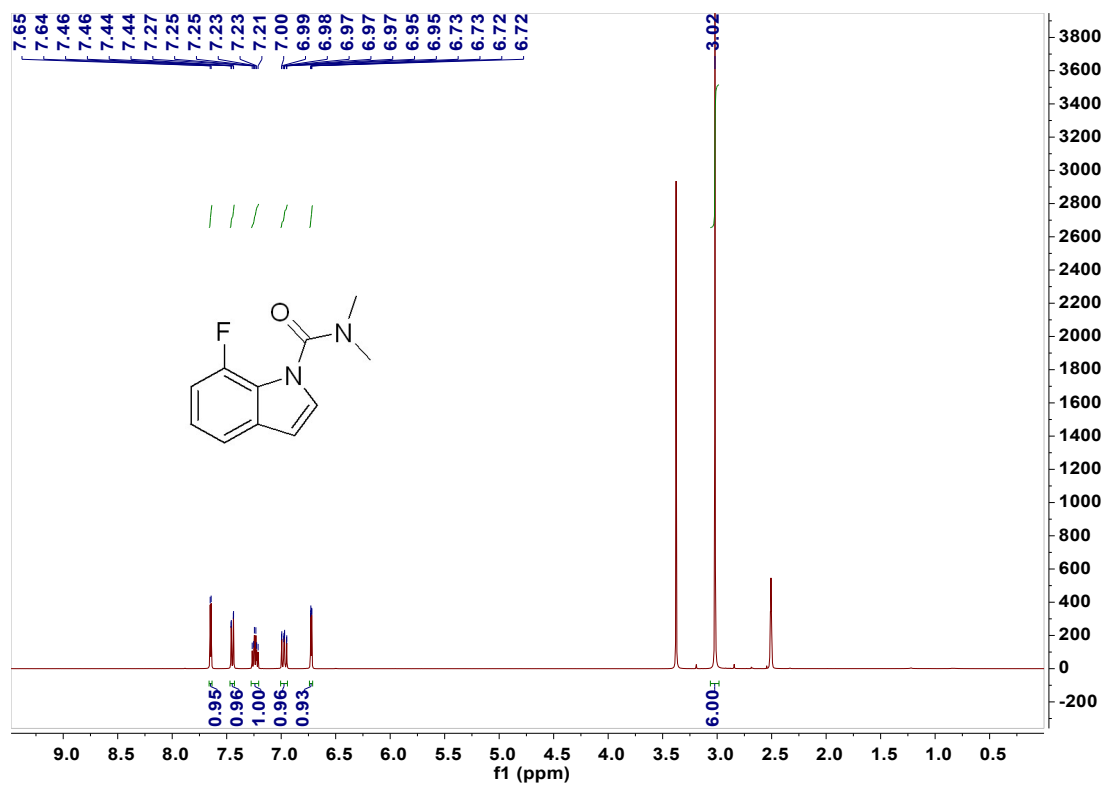

<sup>1</sup>H NMR Spectrum (400 MHz, DMSO-*d*<sub>6</sub>) of **1h**

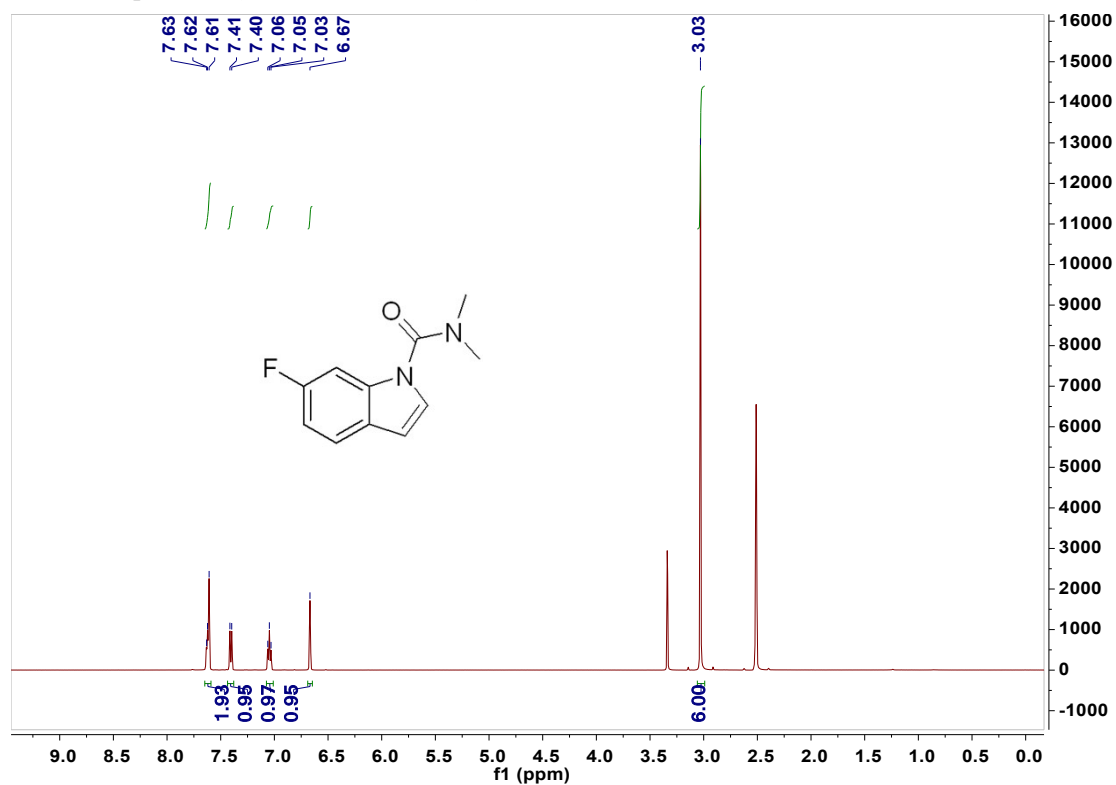

<sup>1</sup>H NMR Spectrum (400 MHz, DMSO-*d*<sub>6</sub>) of **1i**

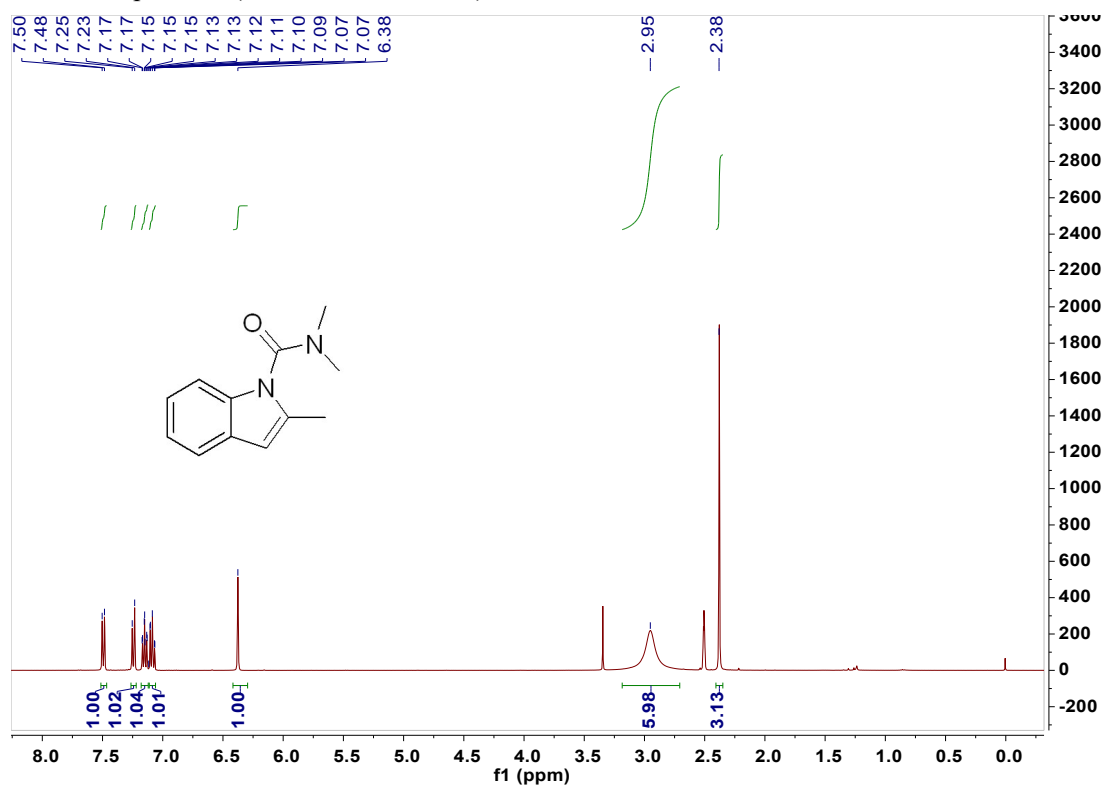

<sup>1</sup>H NMR Spectrum (400 MHz, DMSO-*d*<sub>6</sub>) of **1j**

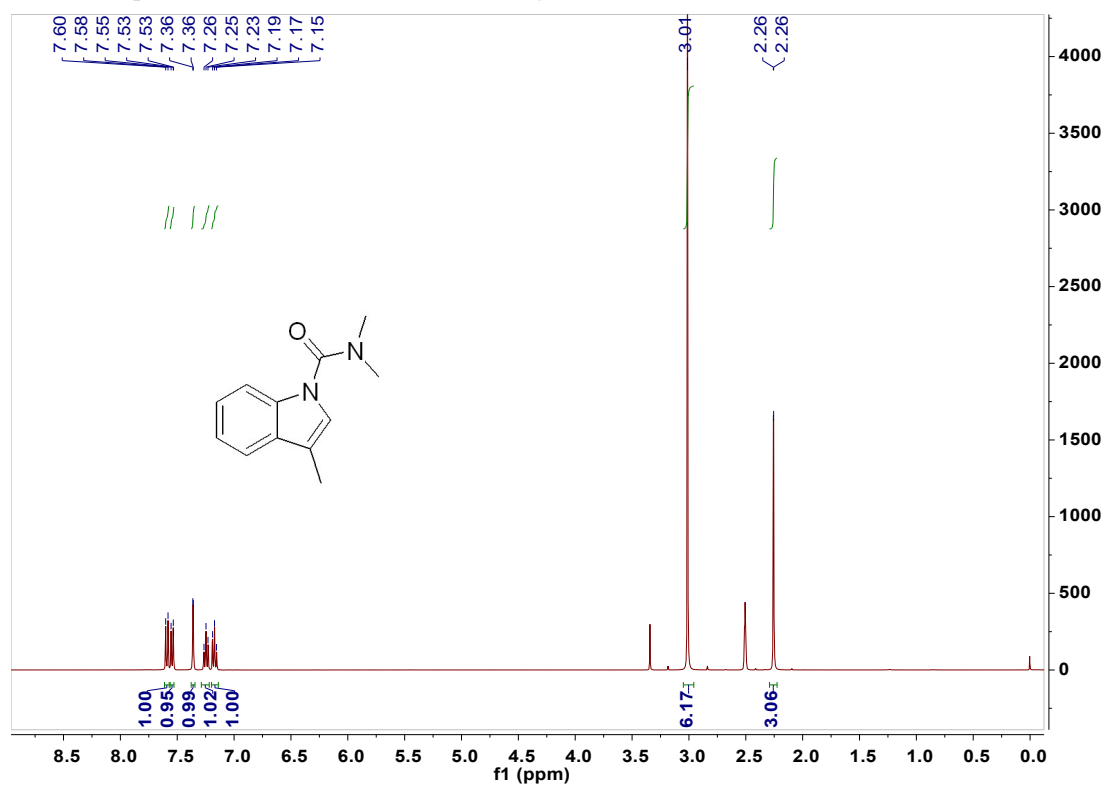

<sup>1</sup>H NMR Spectrum (400 MHz, DMSO-*d*<sub>6</sub>) of **3a**

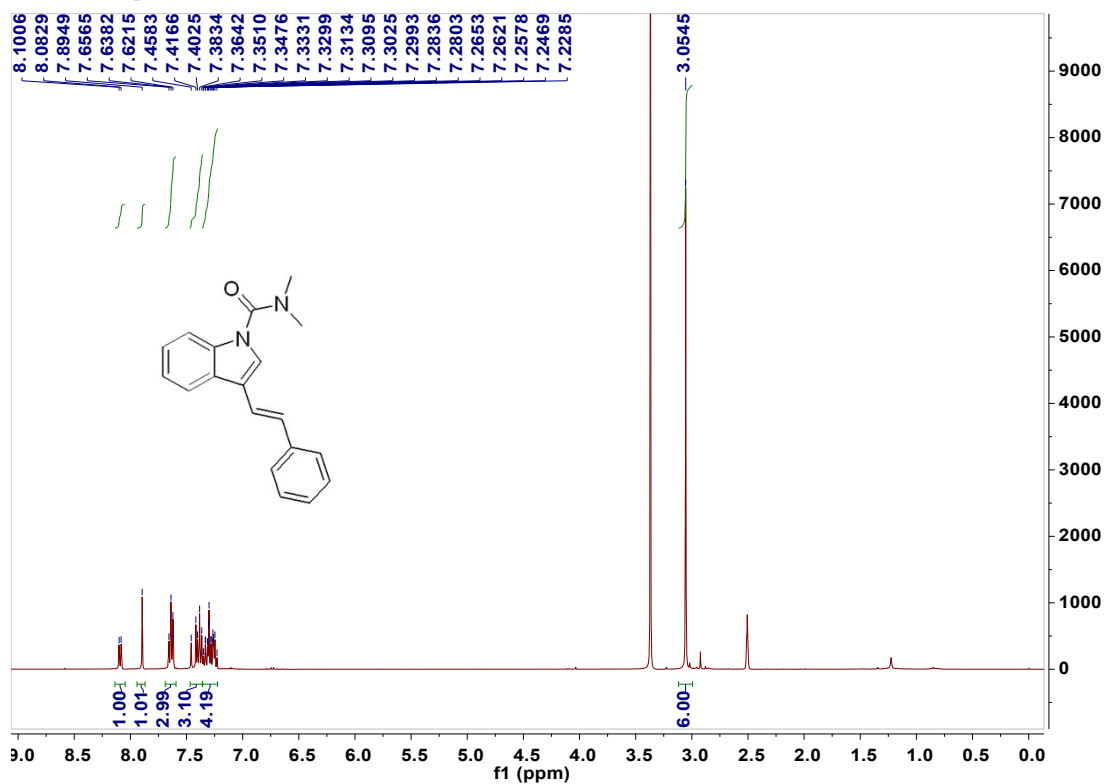

<sup>13</sup>C NMR Spectrum (101 MHz, DMSO-*d*<sub>6</sub>) of **3a**

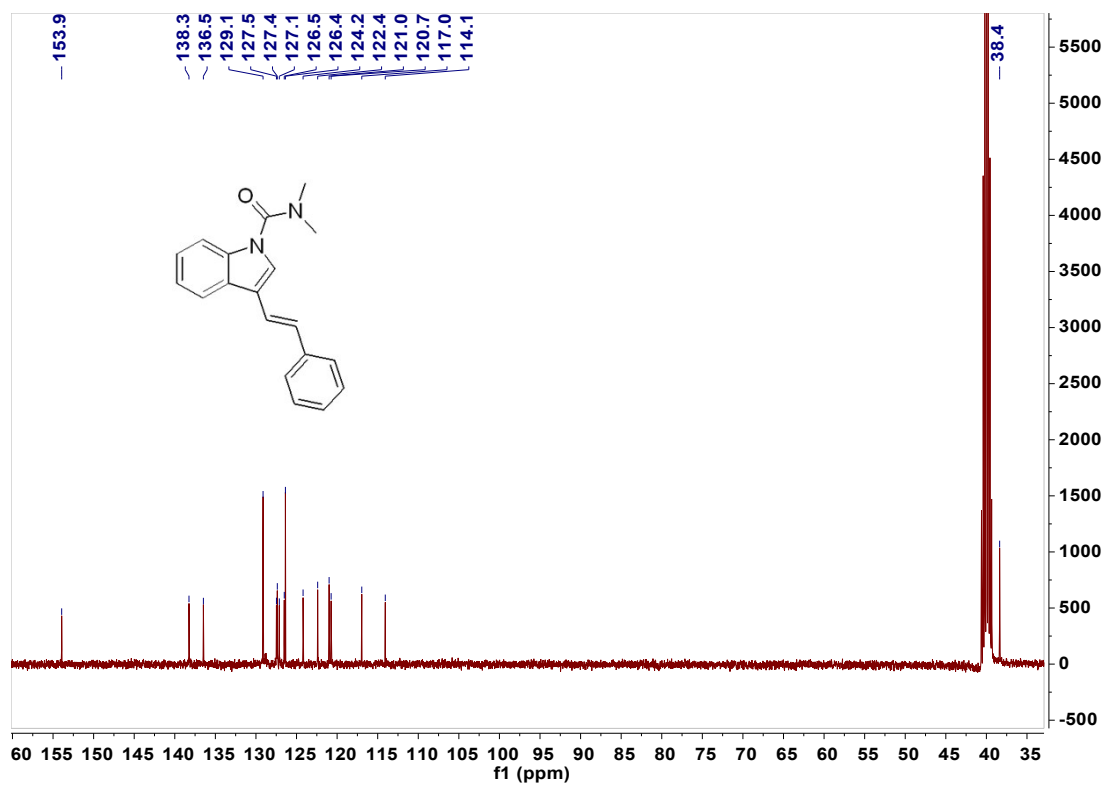

<sup>1</sup>H NMR Spectrum (400 MHz, DMSO-*d*<sub>6</sub>) of **3b**

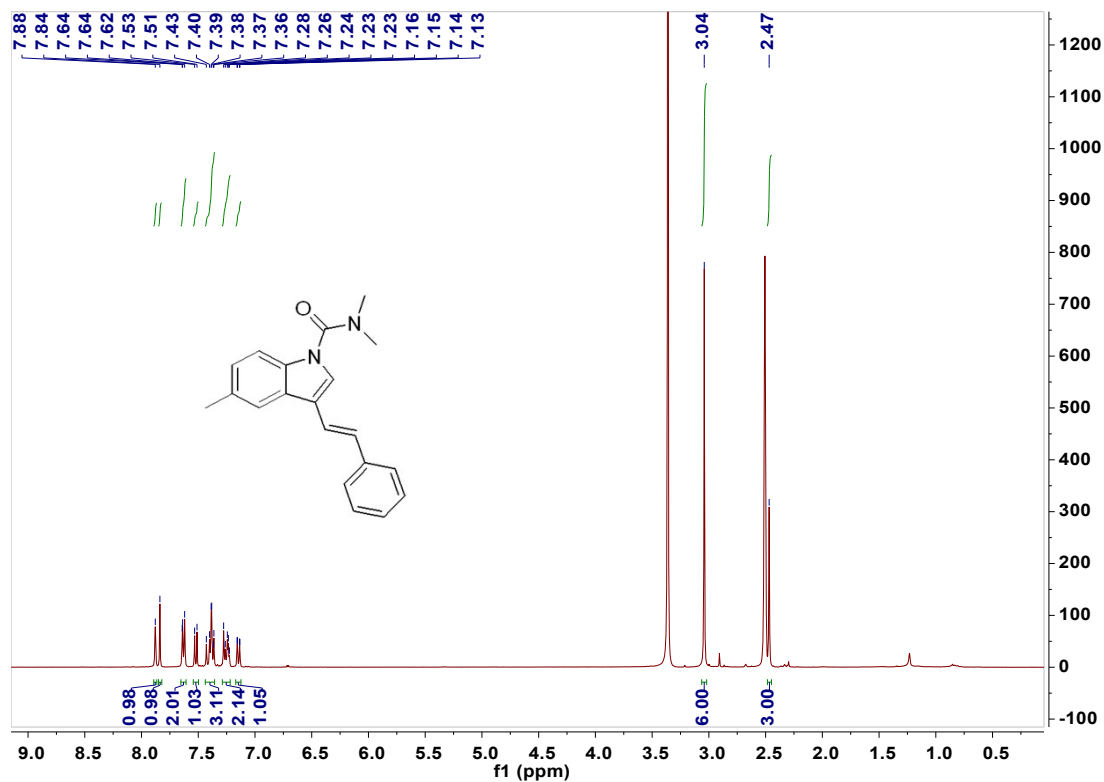

<sup>13</sup>C NMR Spectrum (101 MHz, DMSO-*d*<sub>6</sub>) of **3b**

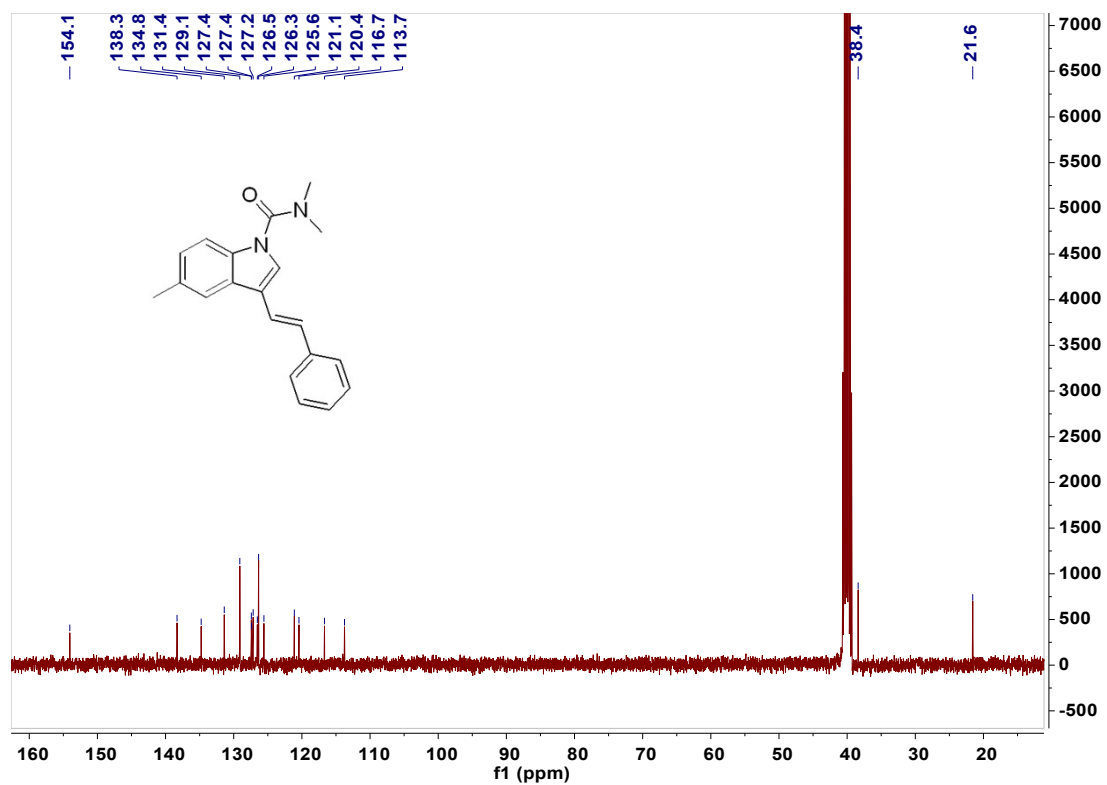

<sup>1</sup>H NMR Spectrum (400 MHz, DMSO-*d*<sub>6</sub>) of **3c**

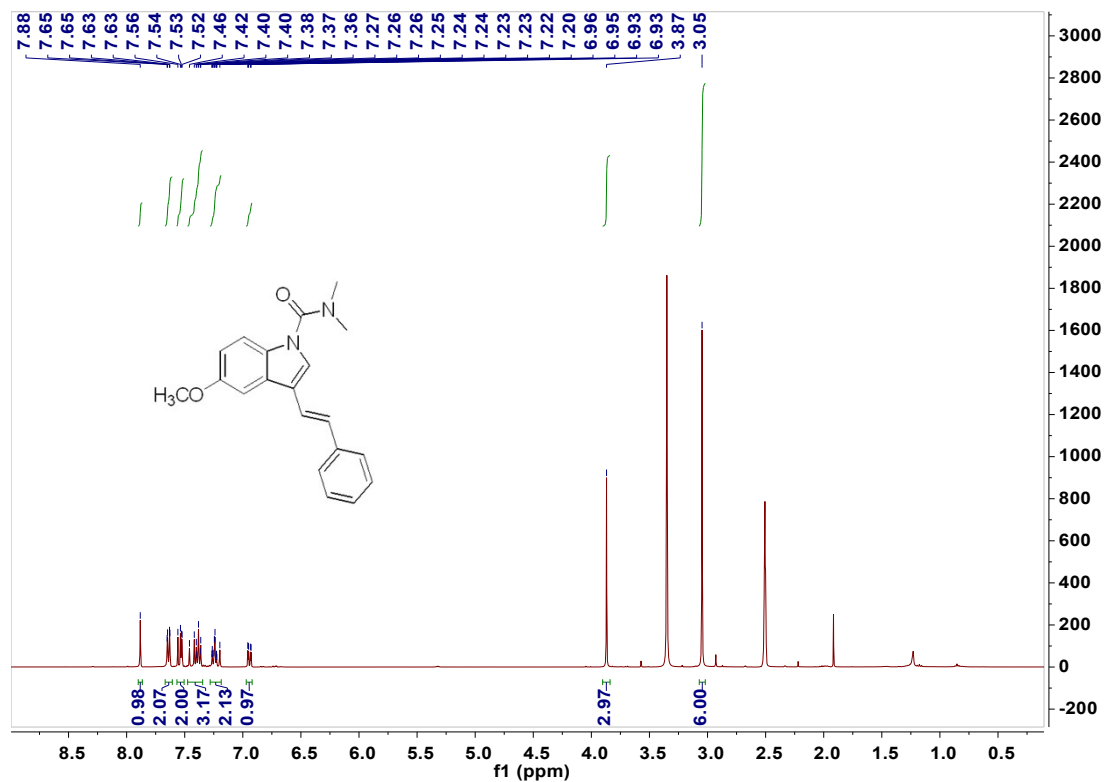

<sup>13</sup>C NMR Spectrum (101 MHz, DMSO-*d*<sub>6</sub>) of **3c**

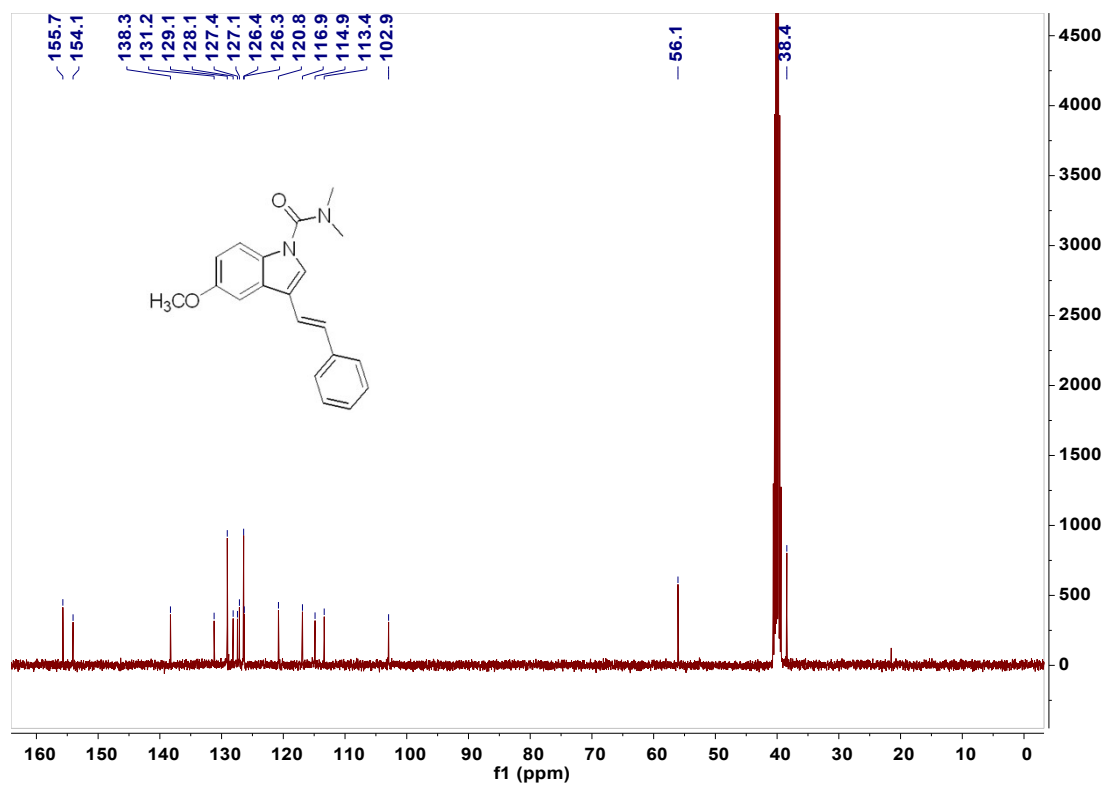

<sup>1</sup>H NMR Spectrum (600 MHz, DMSO-*d*<sub>6</sub>) of **3d**

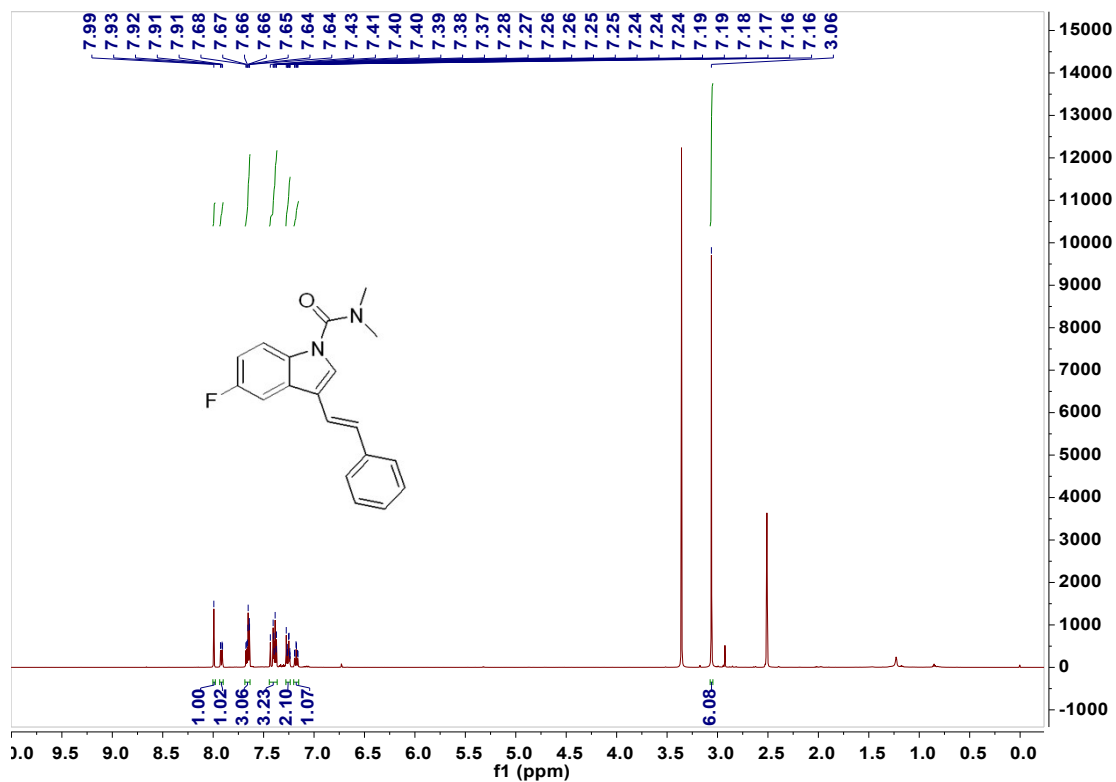

<sup>13</sup>C NMR Spectrum (101 MHz, DMSO-*d*<sub>6</sub>) of **3d**

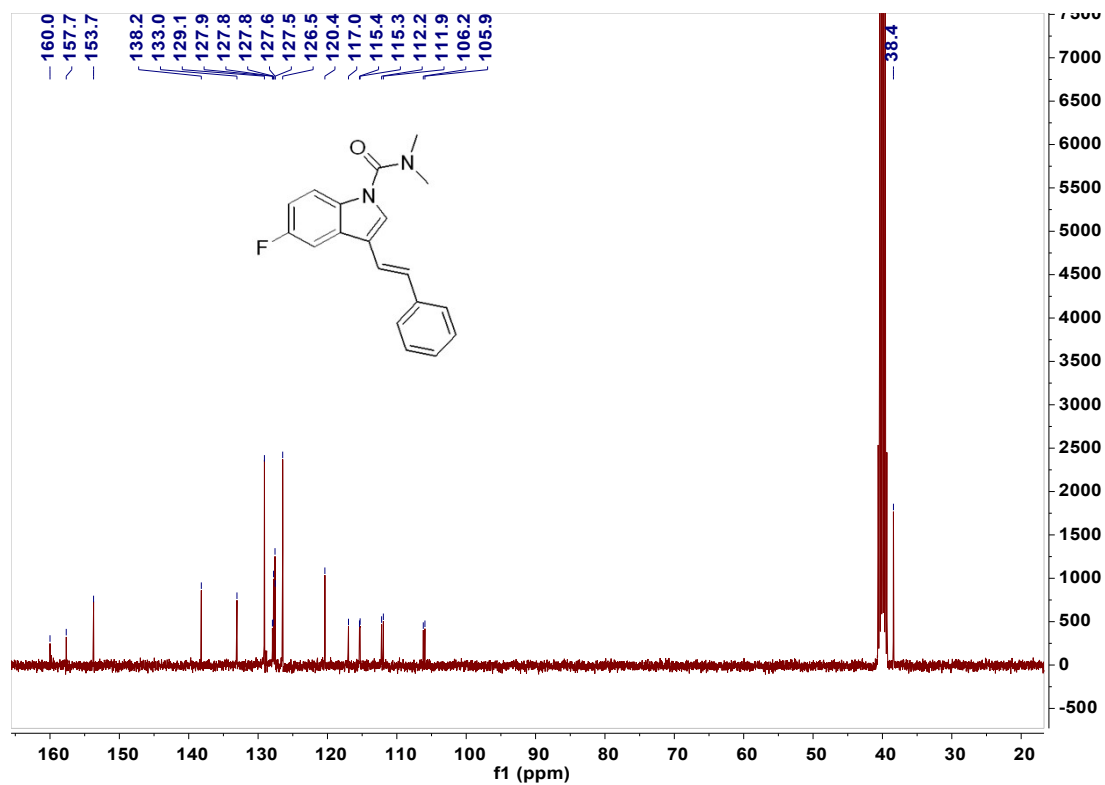

<sup>1</sup>H NMR Spectrum (400 MHz, DMSO-*d*<sub>6</sub>) of **3e**

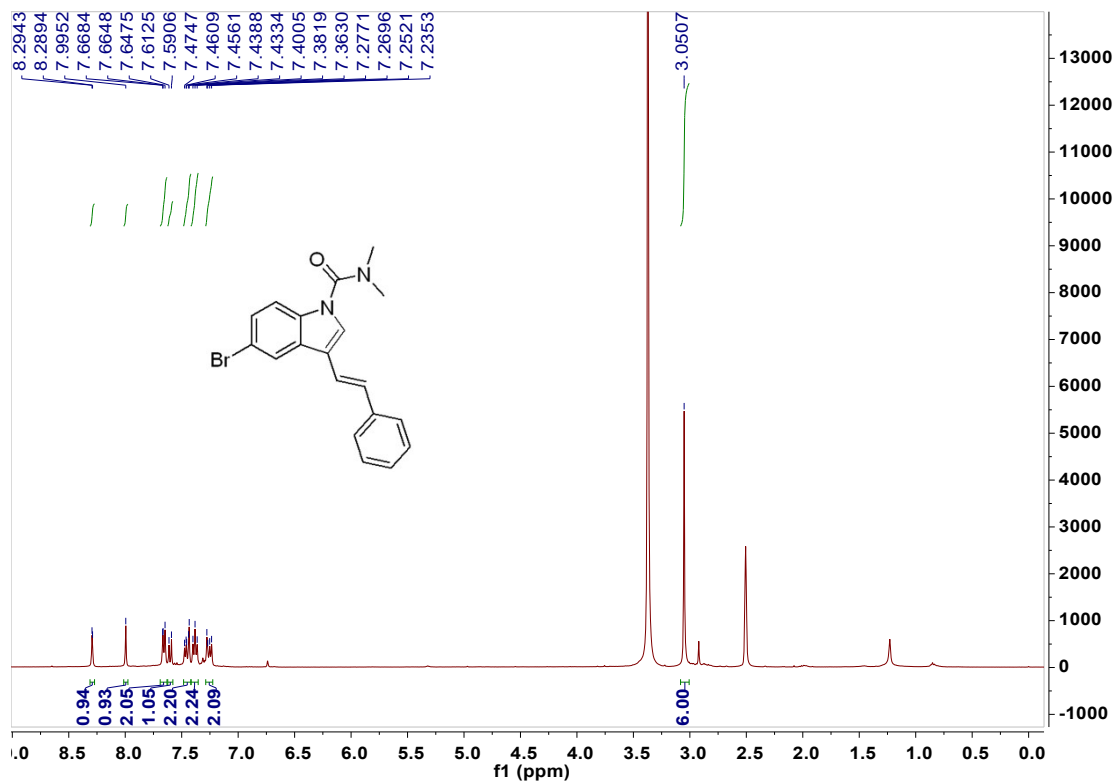

<sup>13</sup>C NMR Spectrum (101 MHz, DMSO-*d*<sub>6</sub>) of **3e**

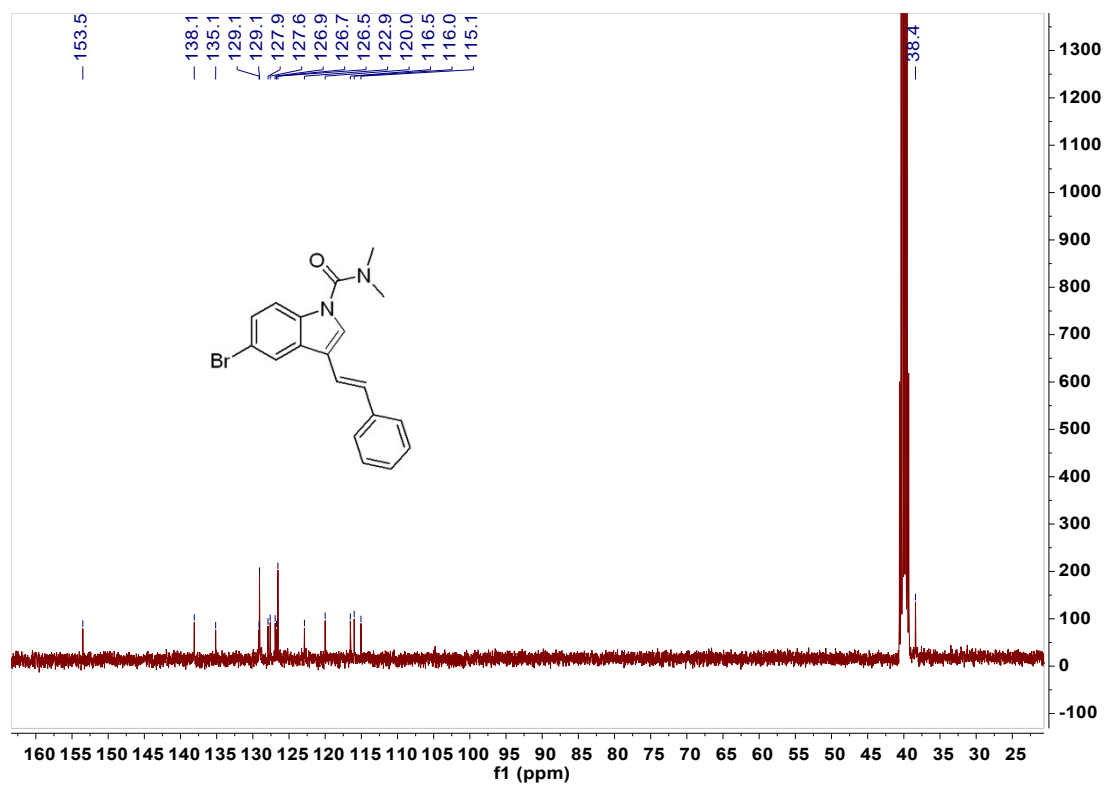



<sup>1</sup>H NMR Spectrum (600 MHz, DMSO-*d*<sub>6</sub>) of **3f**

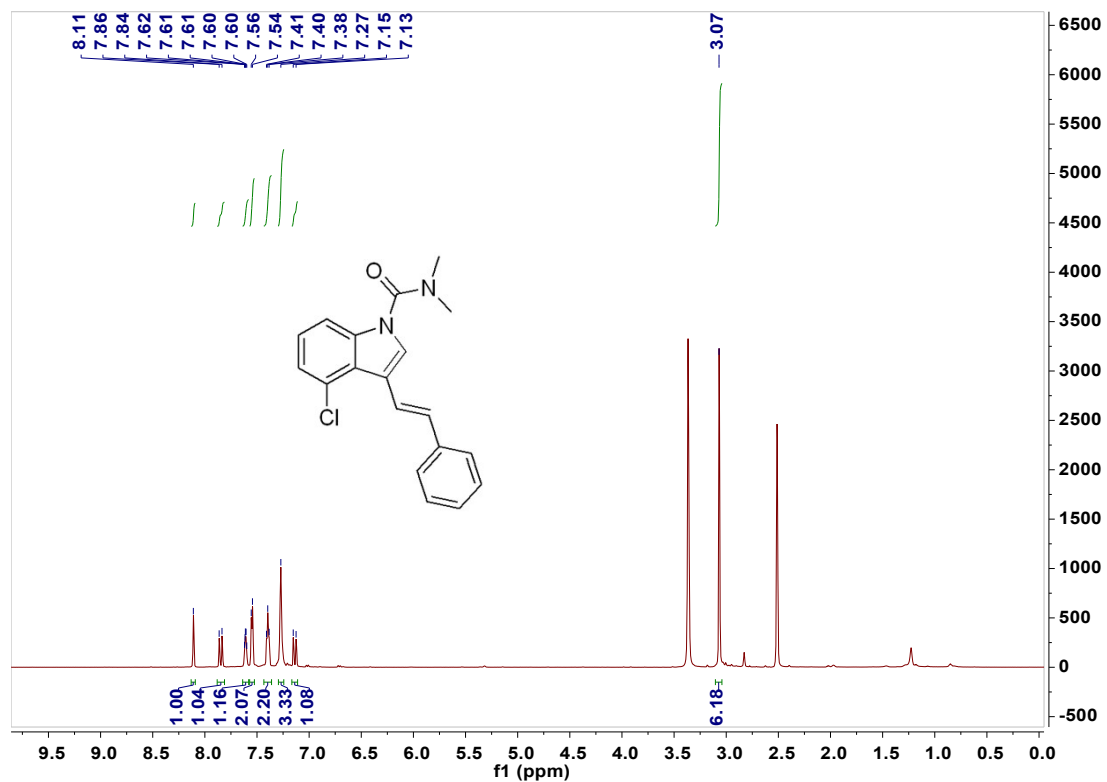

<sup>13</sup>C NMR Spectrum (101MHz, DMSO-*d*<sub>6</sub>) of **3f**

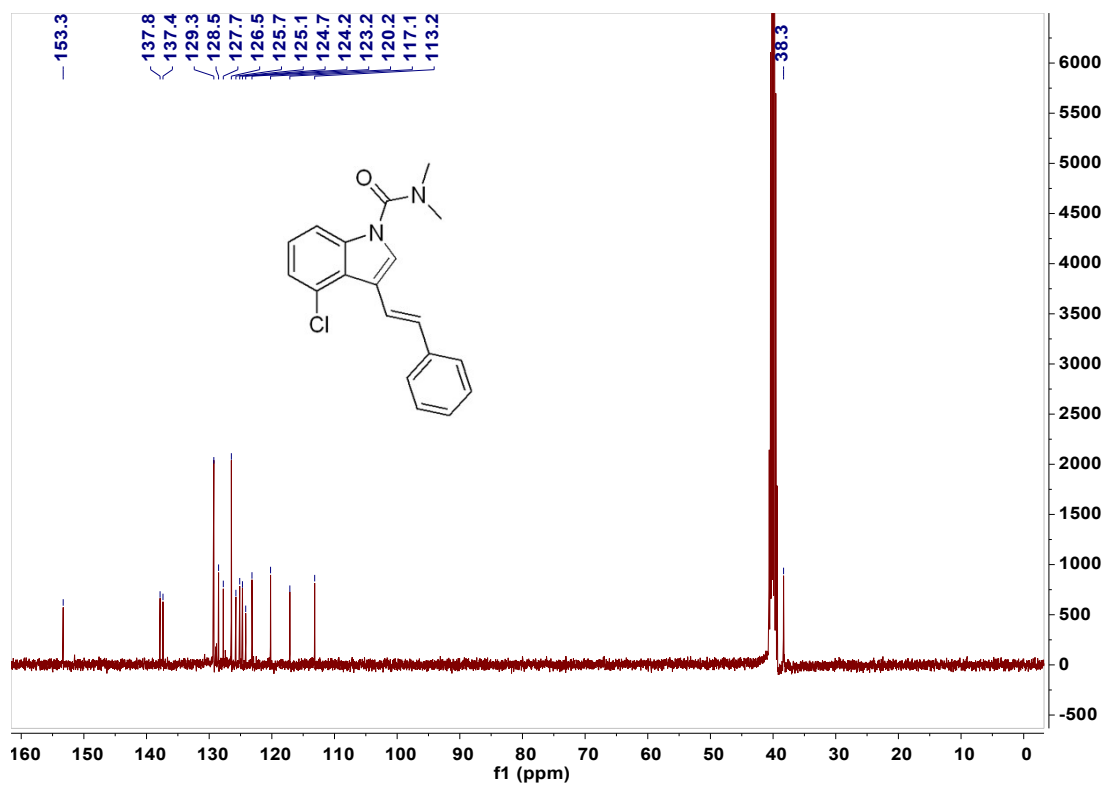

<sup>1</sup>H NMR Spectrum (400 MHz, DMSO-*d*<sub>6</sub>) of **3g**

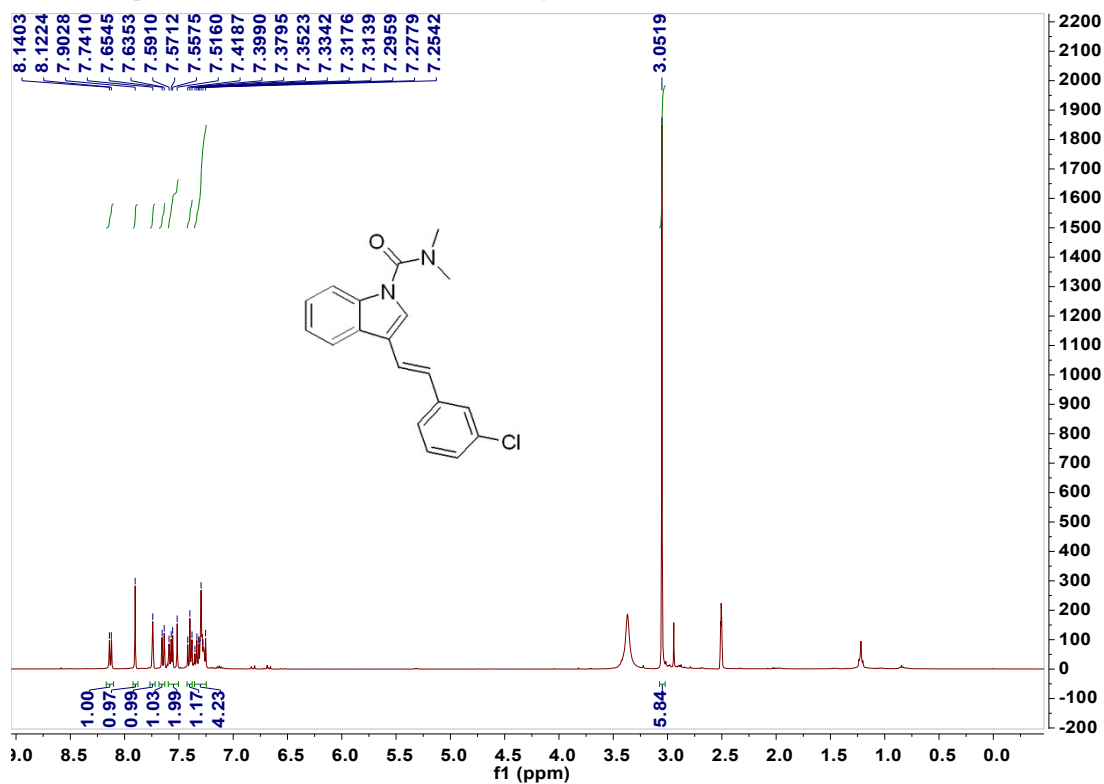

<sup>13</sup>C NMR Spectrum (101 MHz, DMSO-*d*<sub>6</sub>) of **3g**

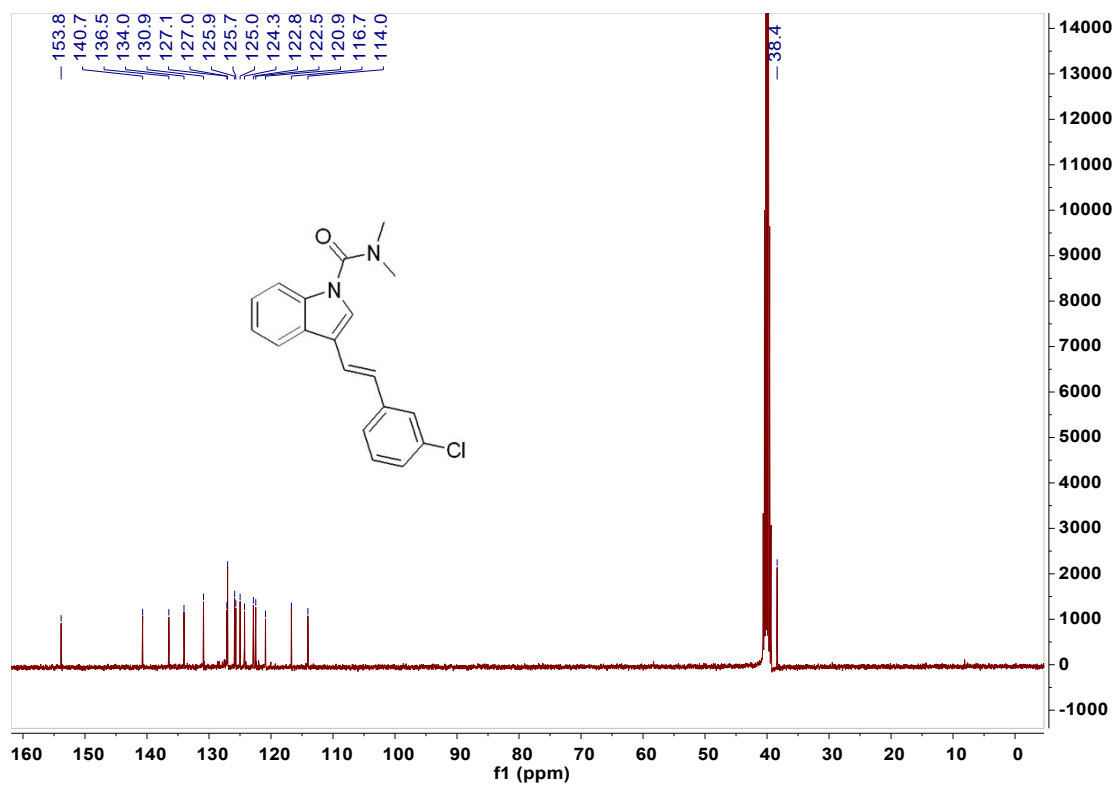

<sup>1</sup>H NMR Spectrum (400 MHz, DMSO-*d*<sub>6</sub>) of **3h**

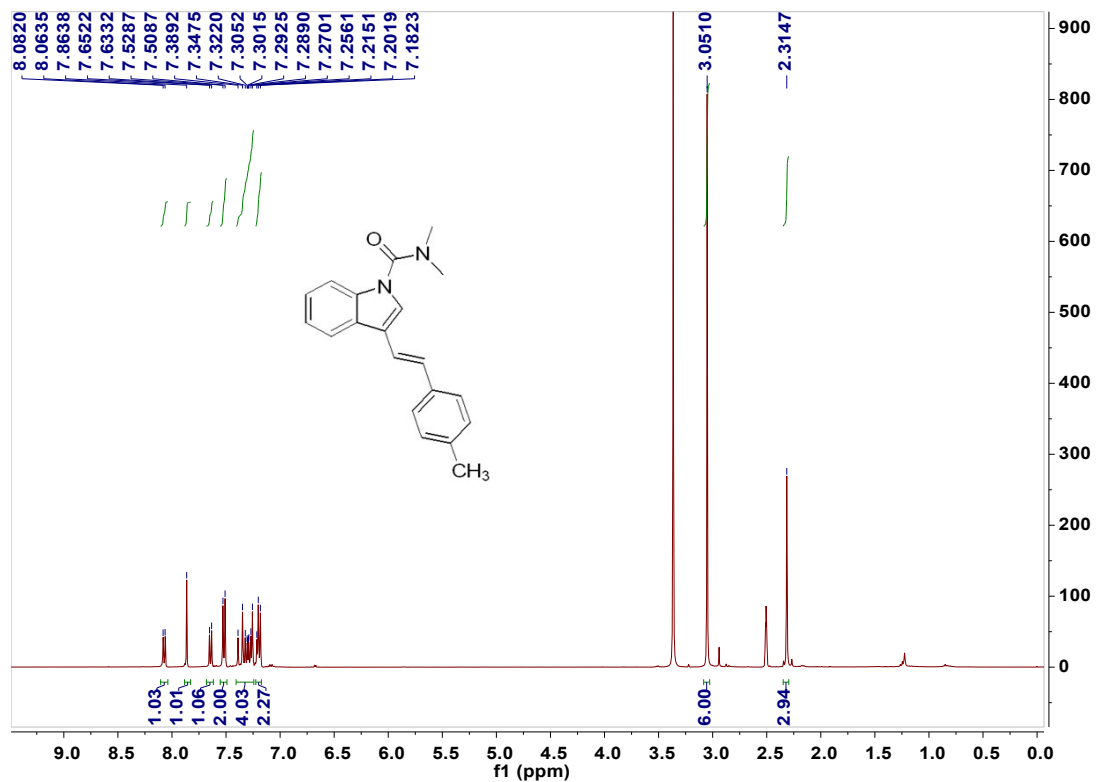

<sup>13</sup>C NMR Spectrum (101 MHz, DMSO-*d*<sub>6</sub>) of **3h**

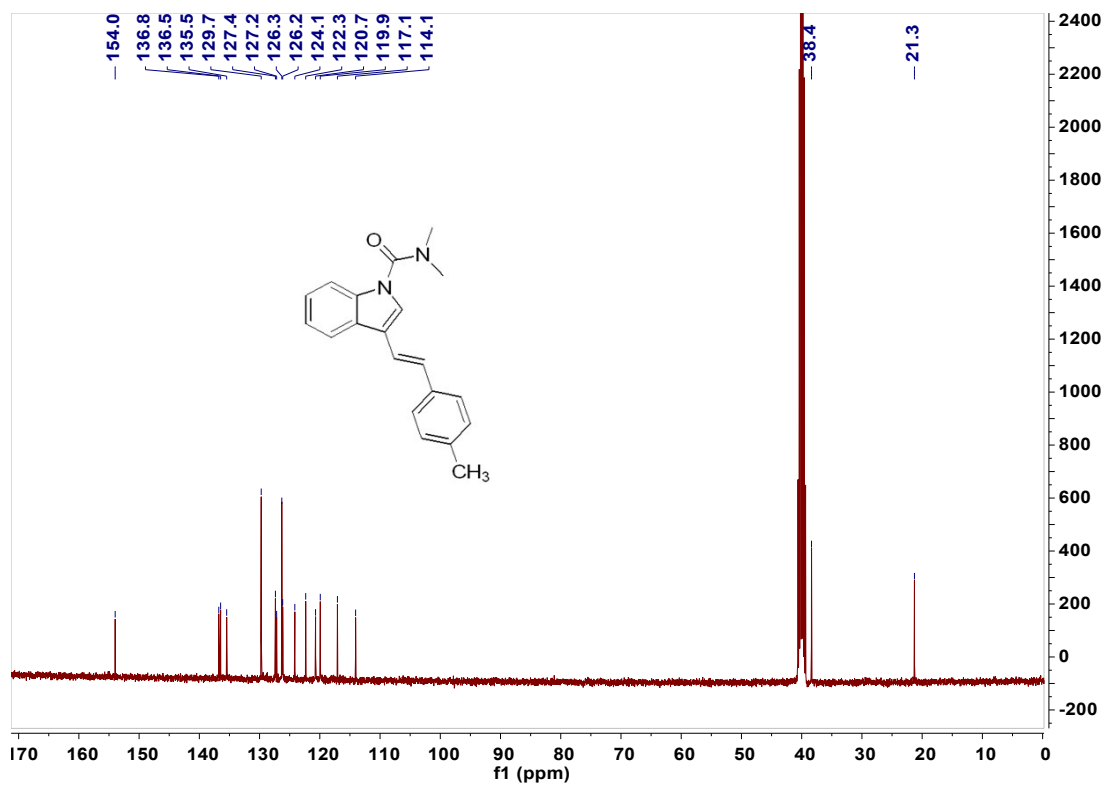

<sup>1</sup>H NMR Spectrum (400 MHz, DMSO-*d*<sub>6</sub>) of **3i**

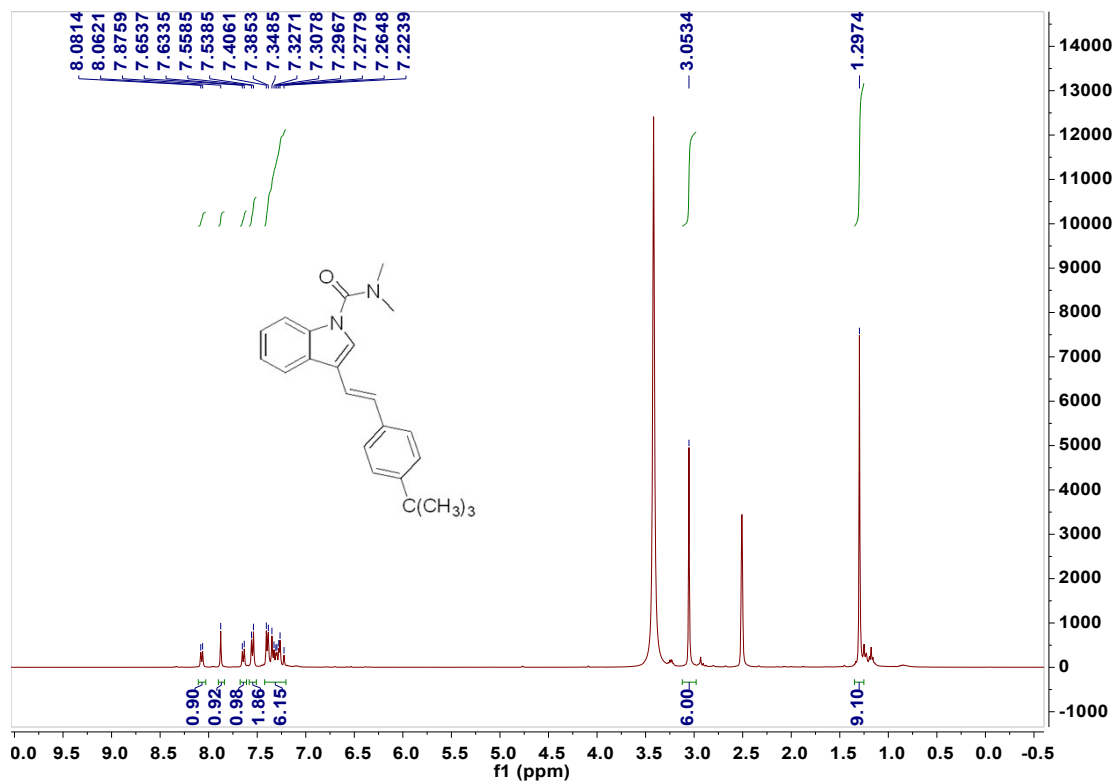

<sup>13</sup>C NMR Spectrum (101 MHz, DMSO-*d*<sub>6</sub>) of **3i**

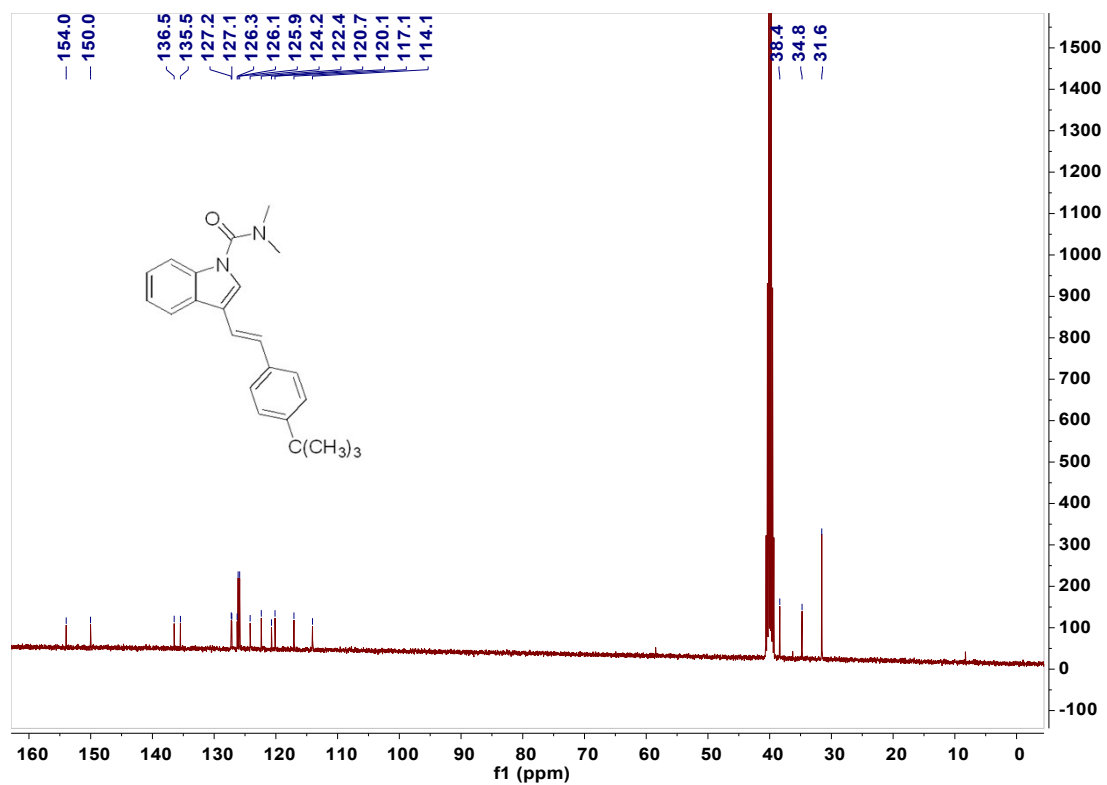

<sup>1</sup>H NMR Spectrum (400 MHz, DMSO-*d*<sub>6</sub>) of **3j**

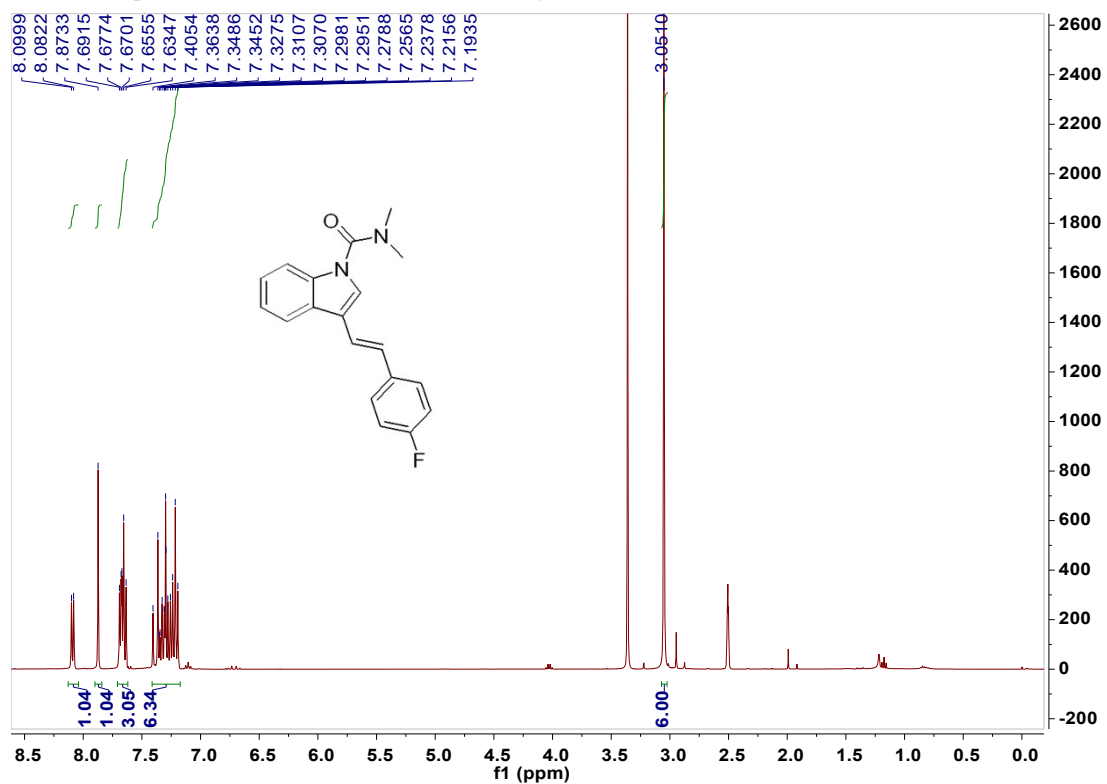

<sup>13</sup>C NMR Spectrum (101 MHz, DMSO-*d*<sub>6</sub>) of **3j**

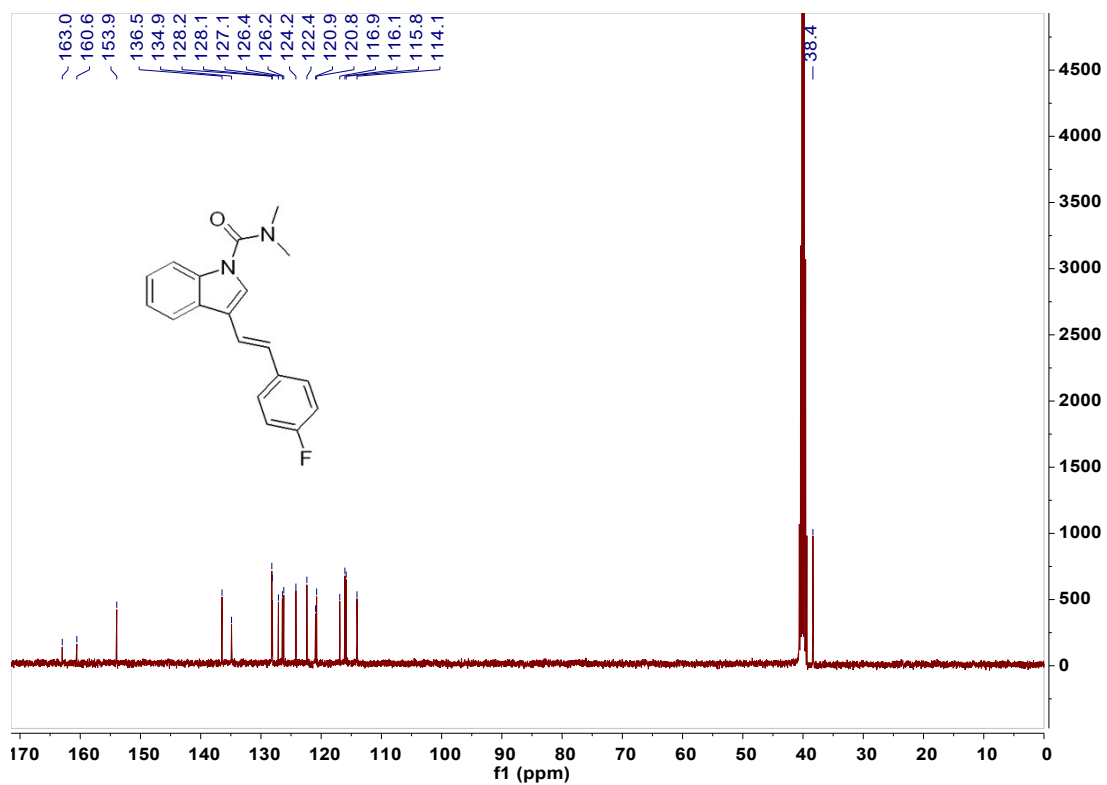

<sup>1</sup>H NMR Spectrum (400 MHz, DMSO-*d*<sub>6</sub>) of **3k**

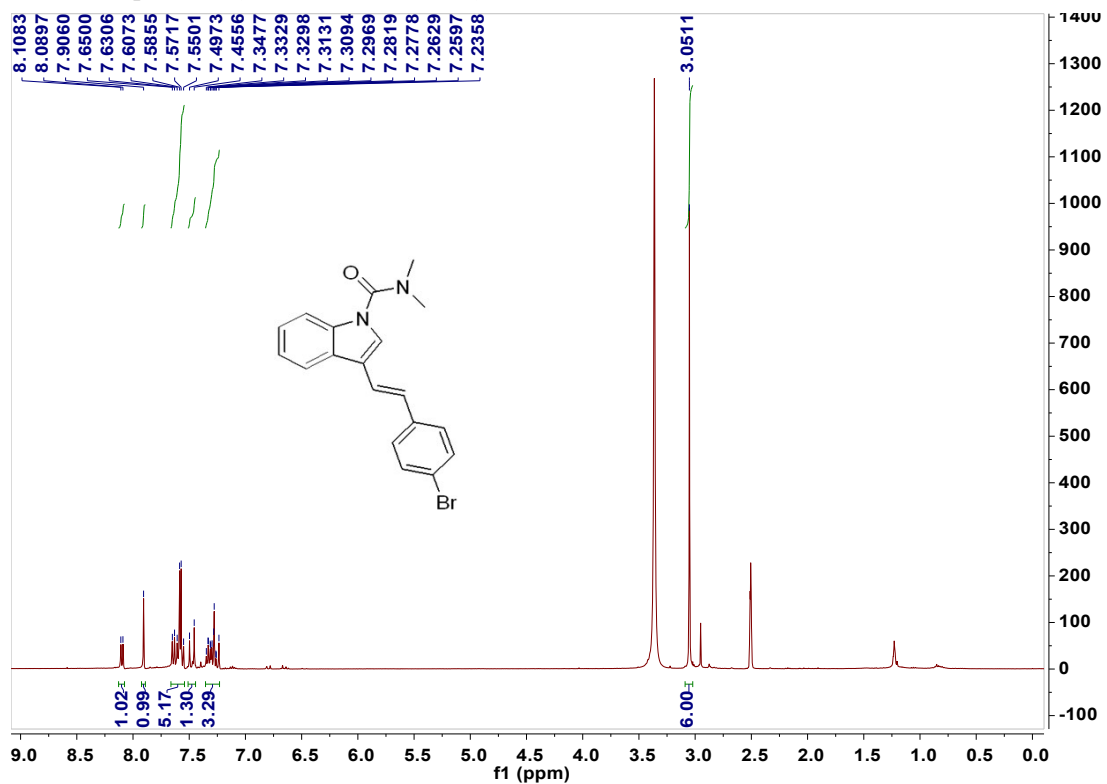

<sup>13</sup>C NMR Spectrum (101 MHz, DMSO-*d*<sub>6</sub>) of **3k**

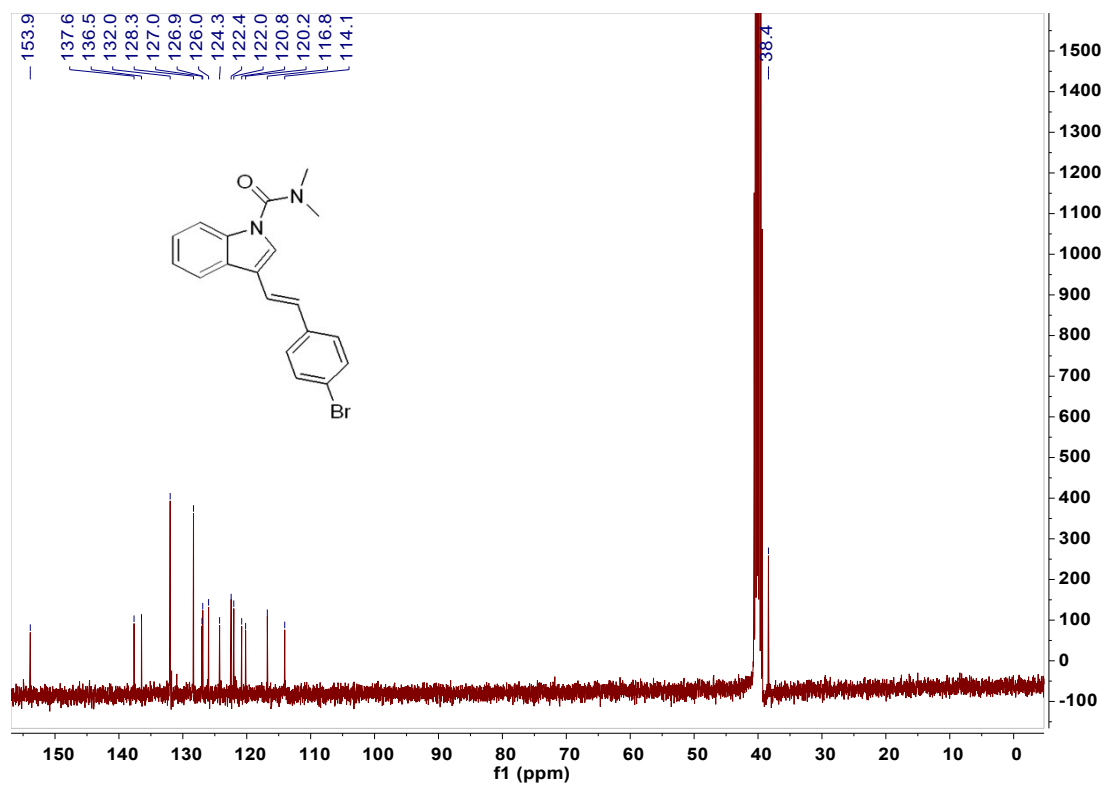

<sup>1</sup>H NMR Spectrum (400 MHz, DMSO-*d*<sub>6</sub>) of **31**

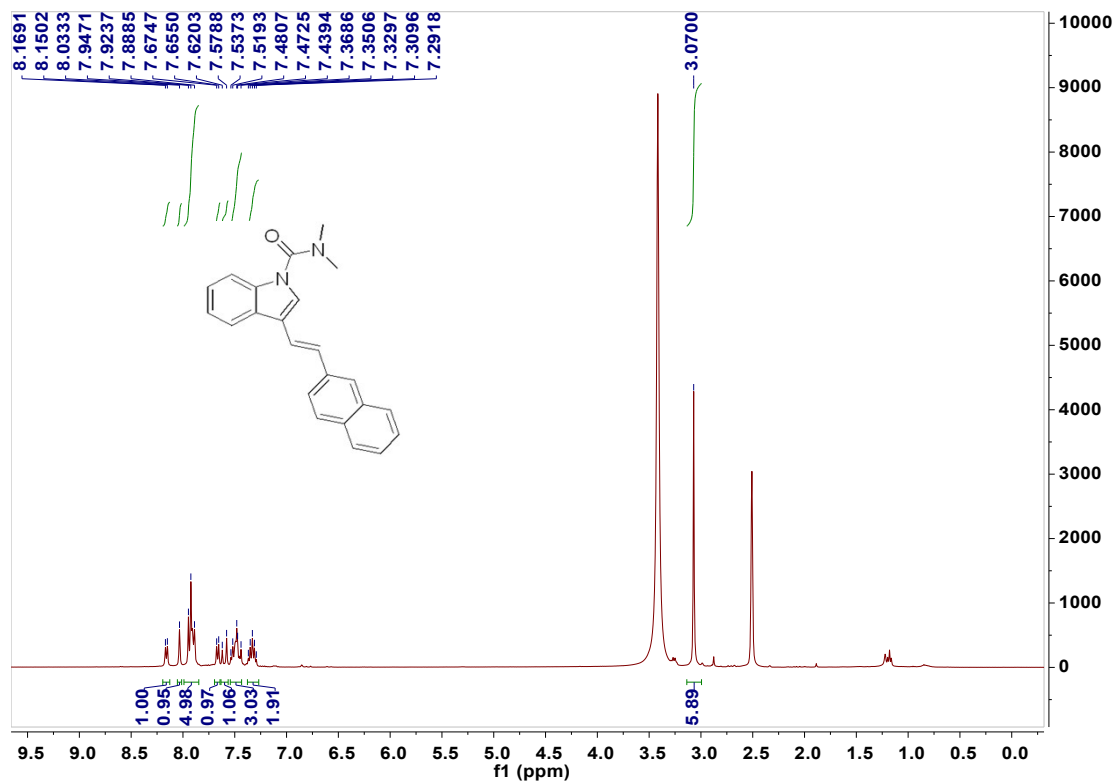

<sup>13</sup>C NMR Spectrum (101 MHz, DMSO-*d*<sub>6</sub>) of **31**

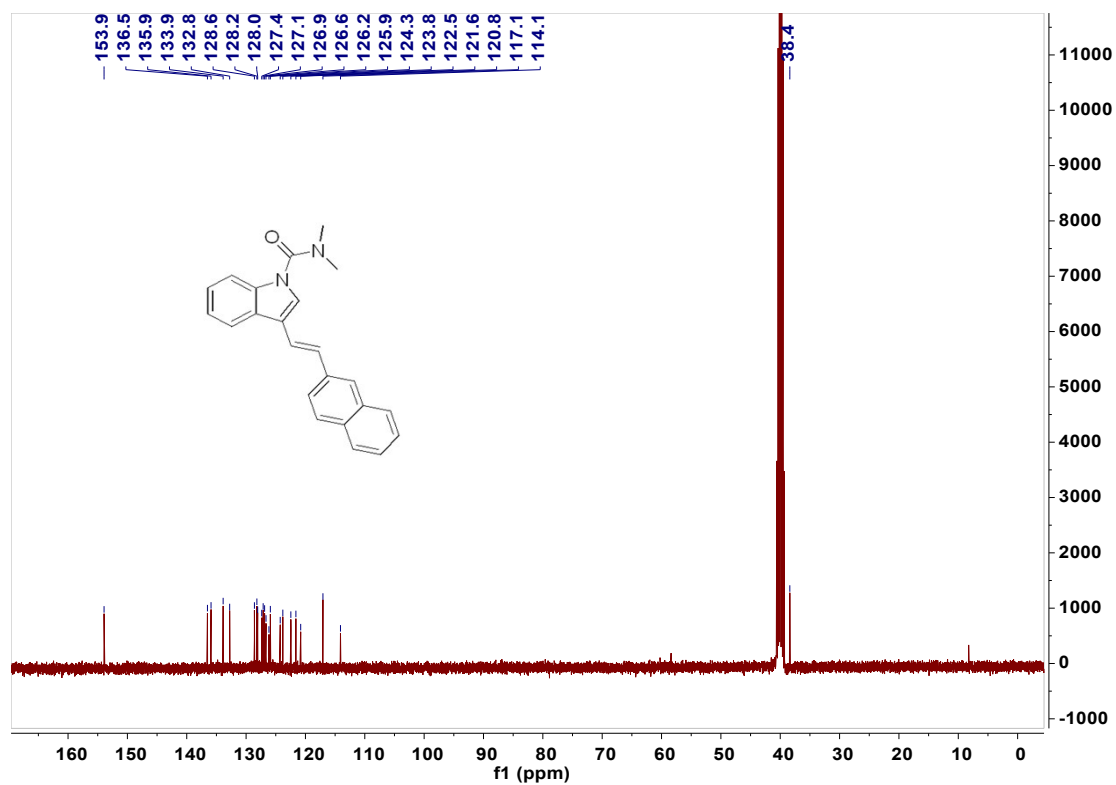

<sup>1</sup>H NMR Spectrum (400 MHz, DMSO-*d*<sub>6</sub>) of **3m**

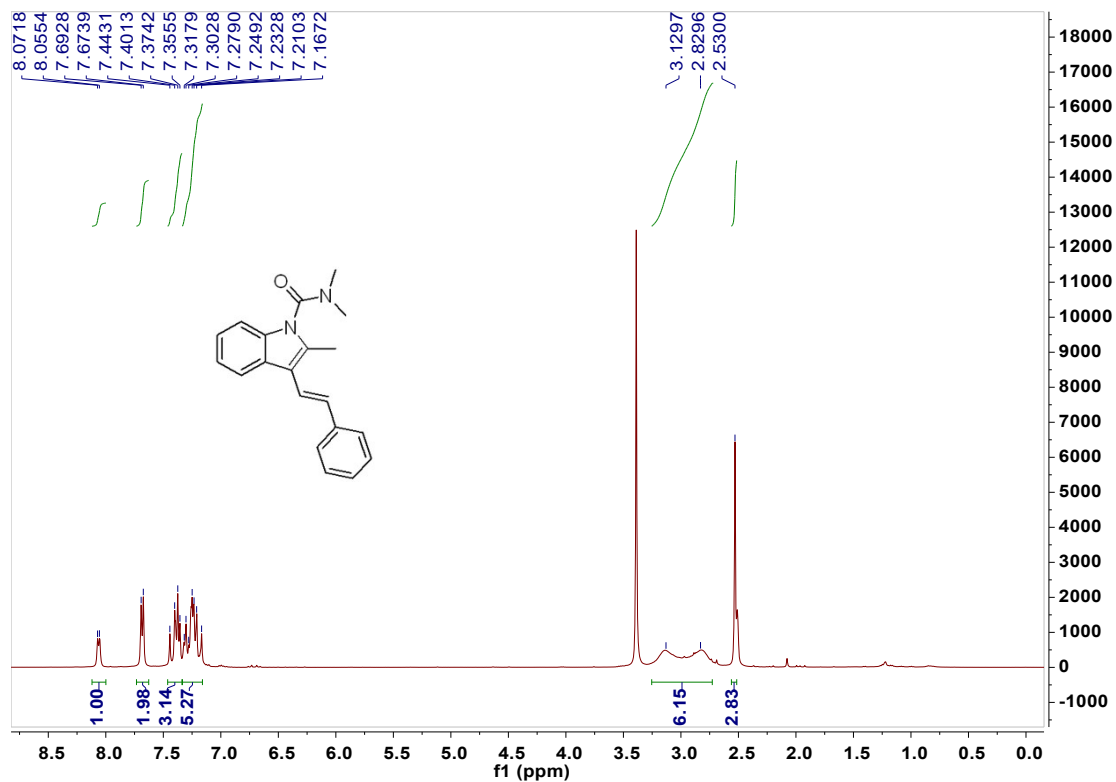

<sup>13</sup>C NMR Spectrum (101 MHz, DMSO-*d*<sub>6</sub>) of **3m**

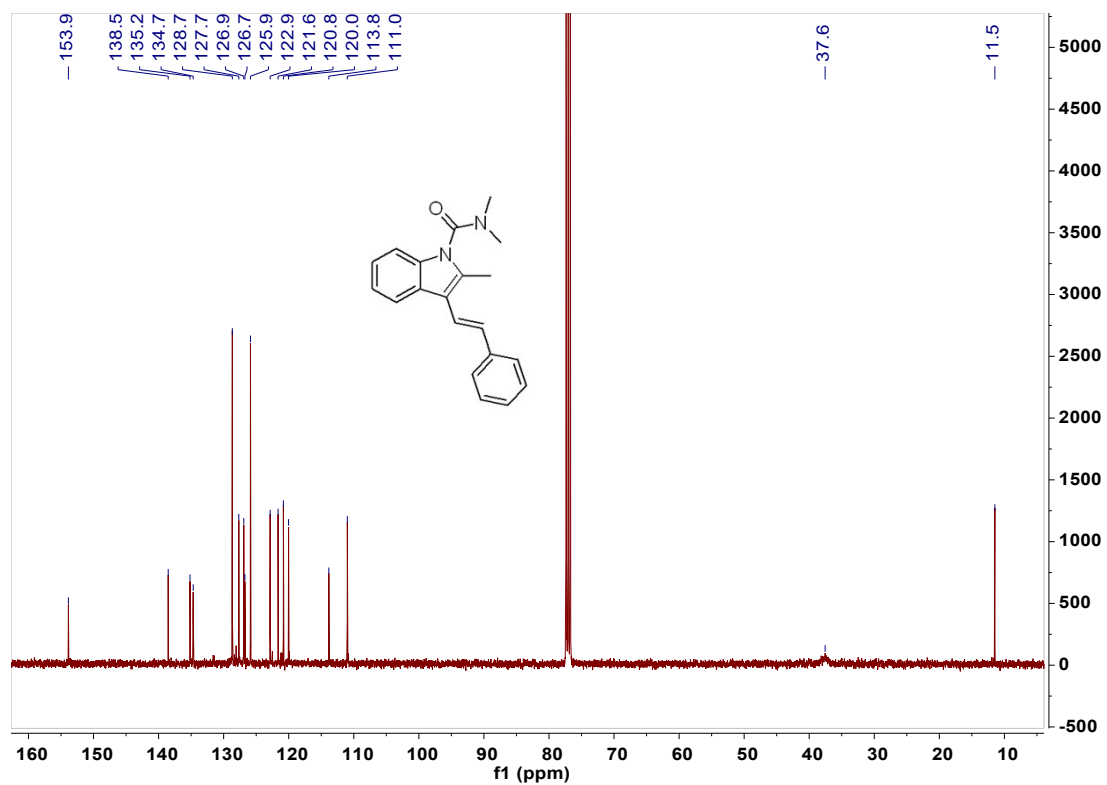



$^1\text{H}$  NMR Spectrum (400 MHz,  $\text{DMSO-}d_6$ ) of **5a**

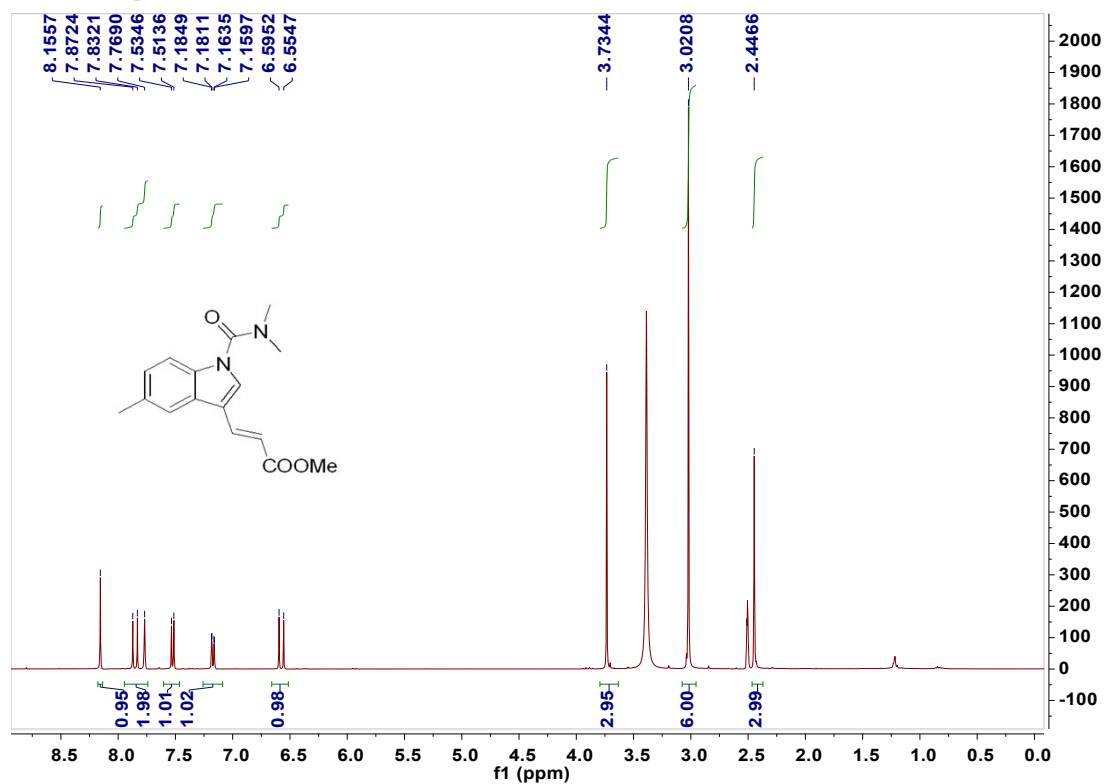

$^{13}\text{C}$  NMR Spectrum (101 MHz,  $\text{DMSO-}d_6$ ) of **5a**

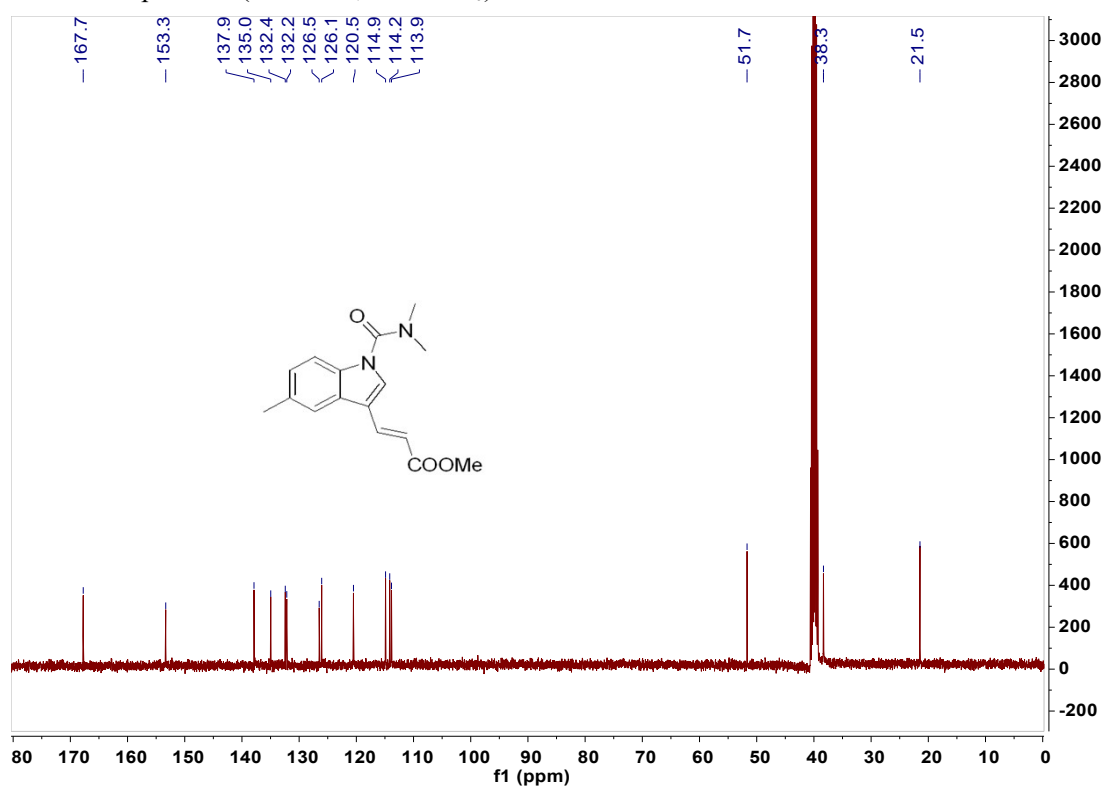

$^1\text{H}$  NMR Spectrum (400 MHz,  $\text{DMSO-}d_6$ ) of **5b**

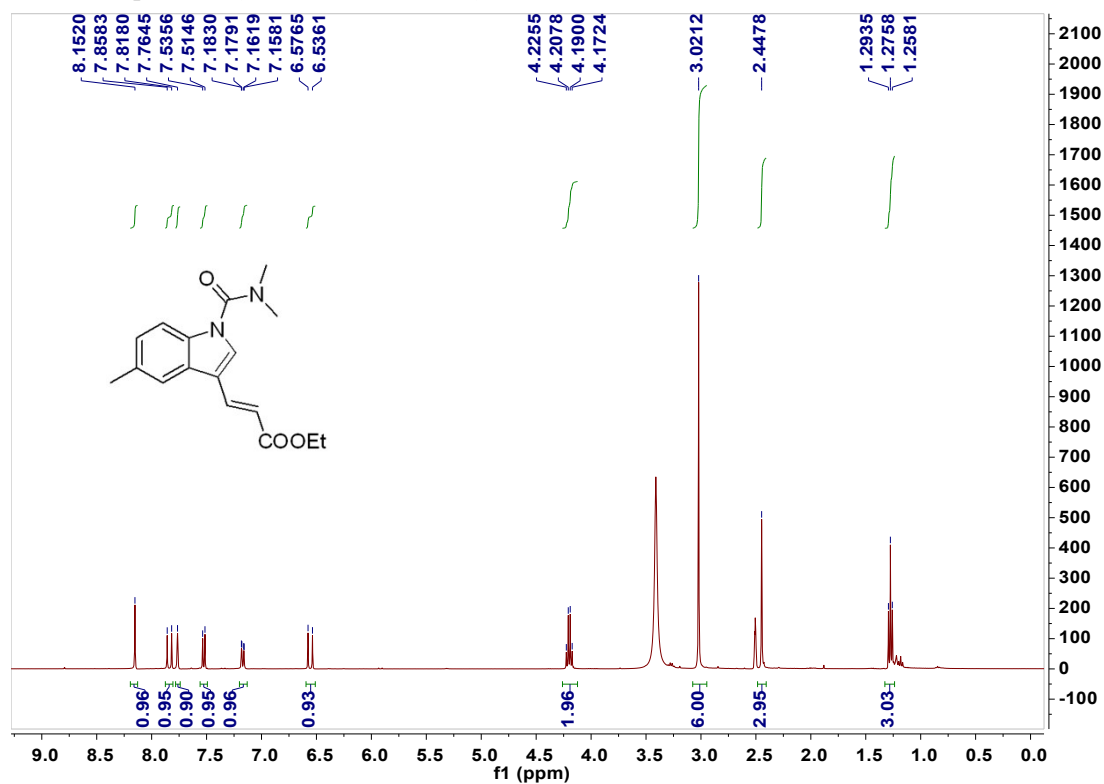

$^{13}\text{C}$  NMR Spectrum (101 MHz,  $\text{DMSO-}d_6$ ) of **5b**

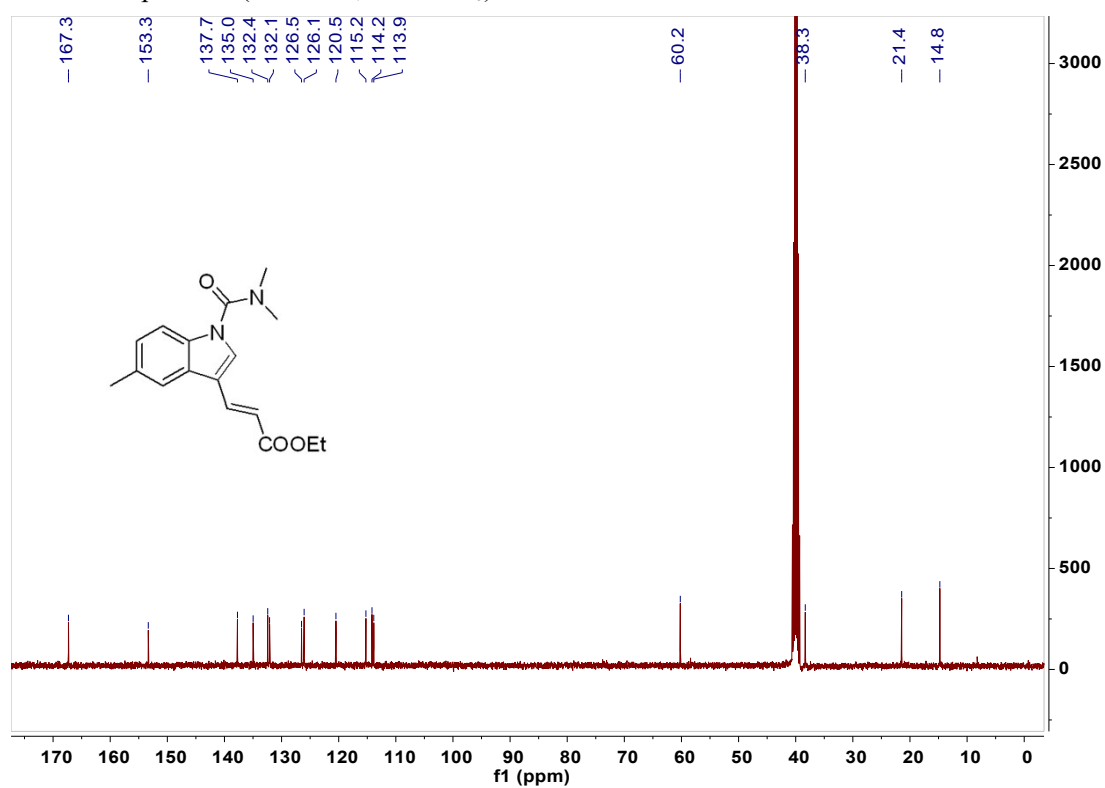

<sup>1</sup>H NMR Spectrum (400 MHz, DMSO-*d*<sub>6</sub>) of **5c**

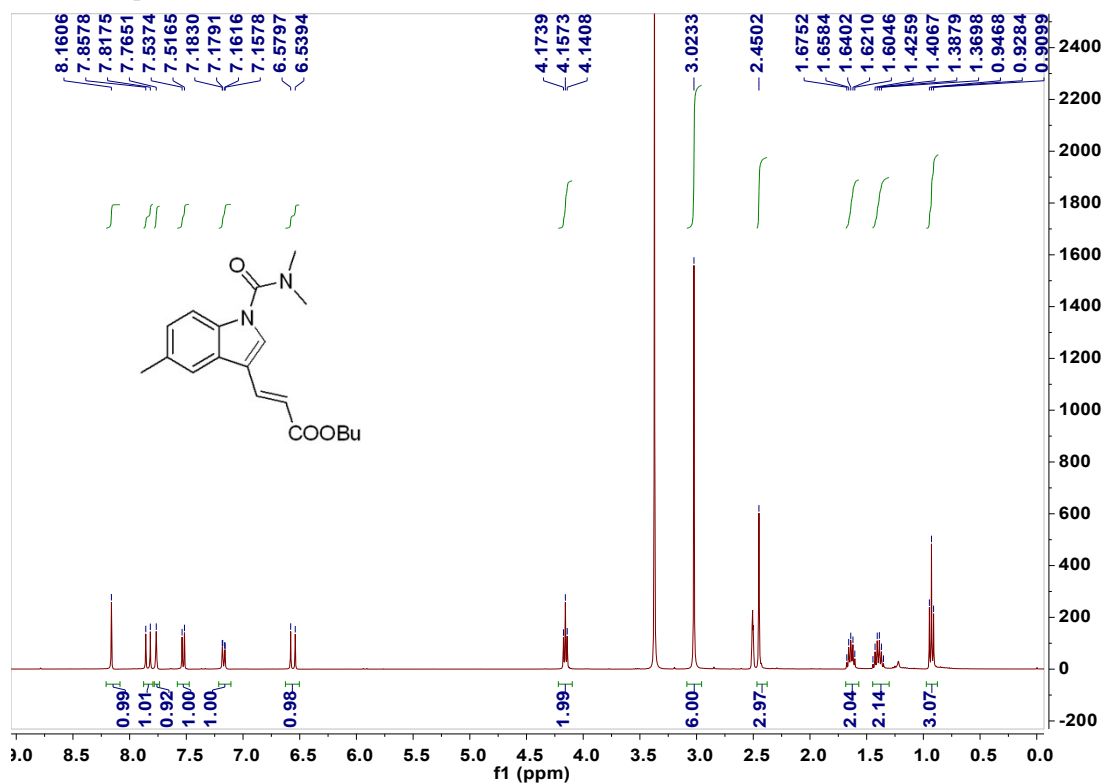

<sup>13</sup>C NMR Spectrum (101 MHz, DMSO-*d*<sub>6</sub>) of **5c**

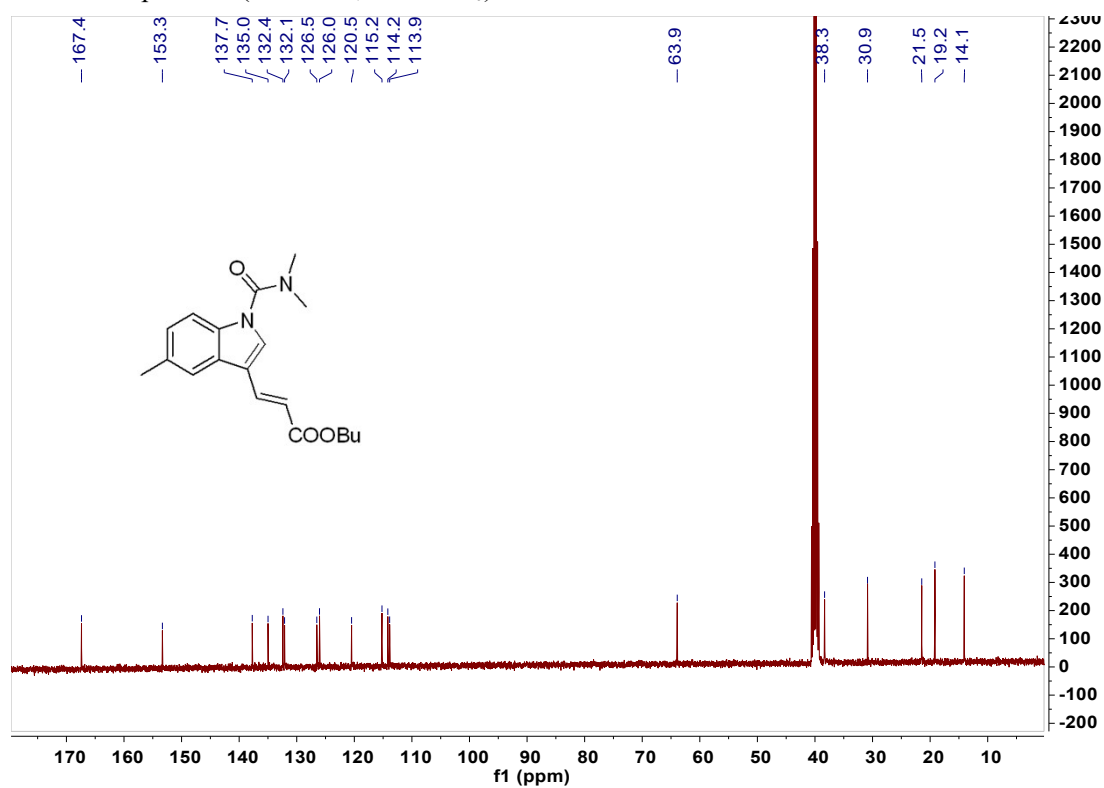

<sup>1</sup>H NMR Spectrum (400 MHz, DMSO-*d*<sub>6</sub>) of **5d**

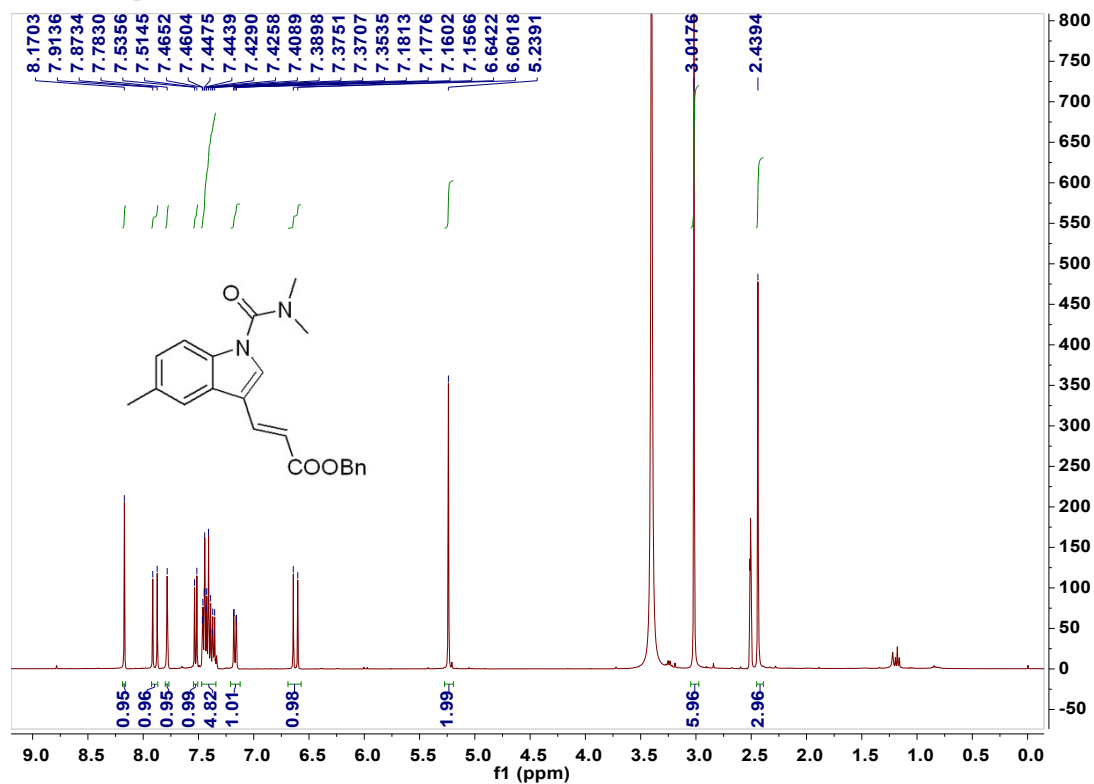

<sup>13</sup>C NMR Spectrum (101 MHz, DMSO-*d*<sub>6</sub>) of **5d**

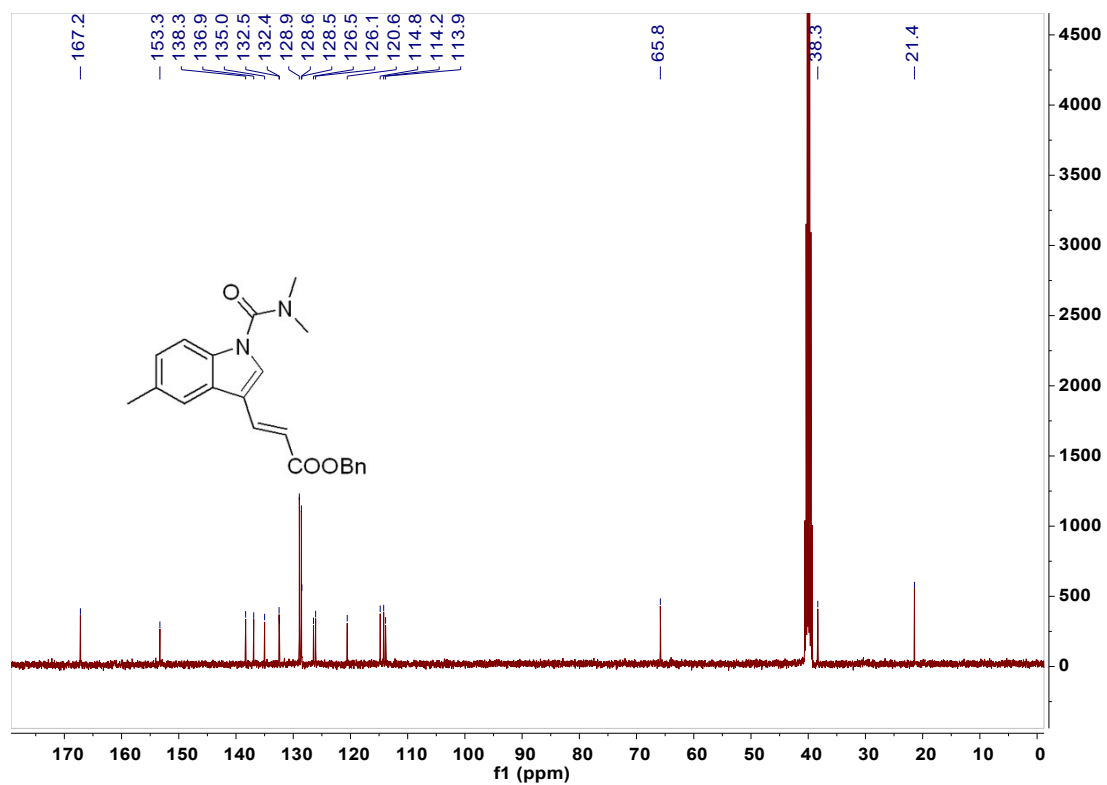

<sup>1</sup>H NMR Spectrum (400 MHz, DMSO-d<sub>6</sub>) of **5e**

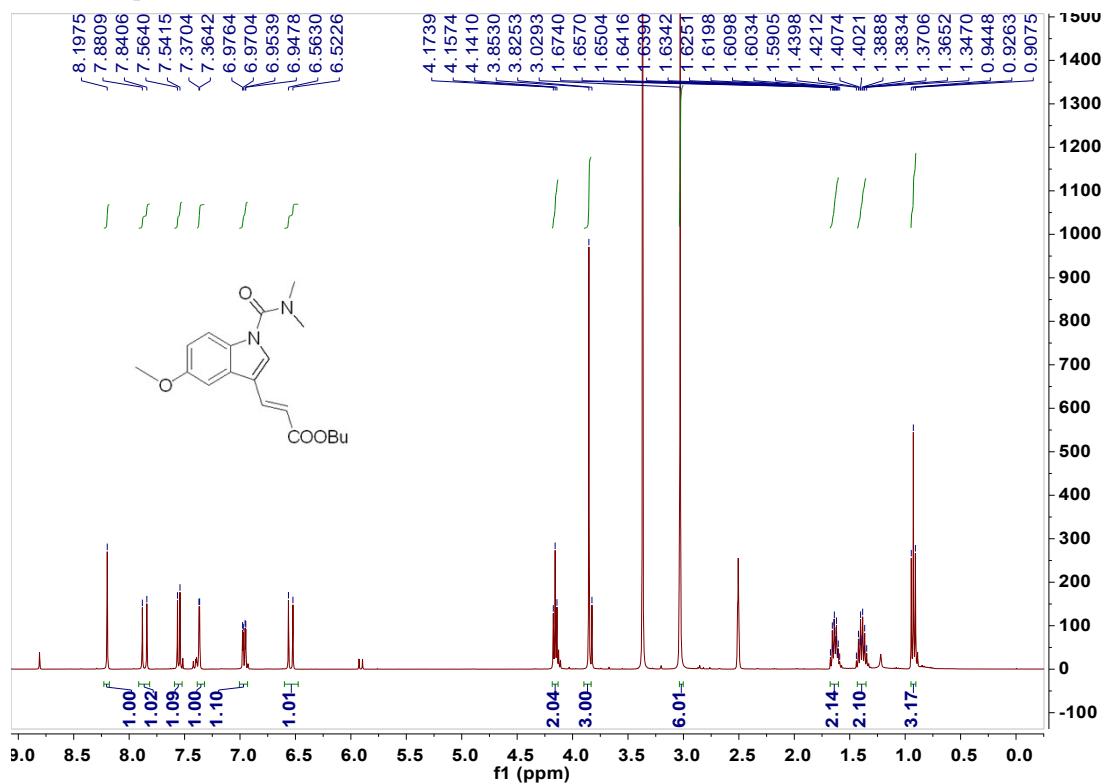

<sup>13</sup>C NMR Spectrum (101 MHz, DMSO-d<sub>6</sub>) of **5e**

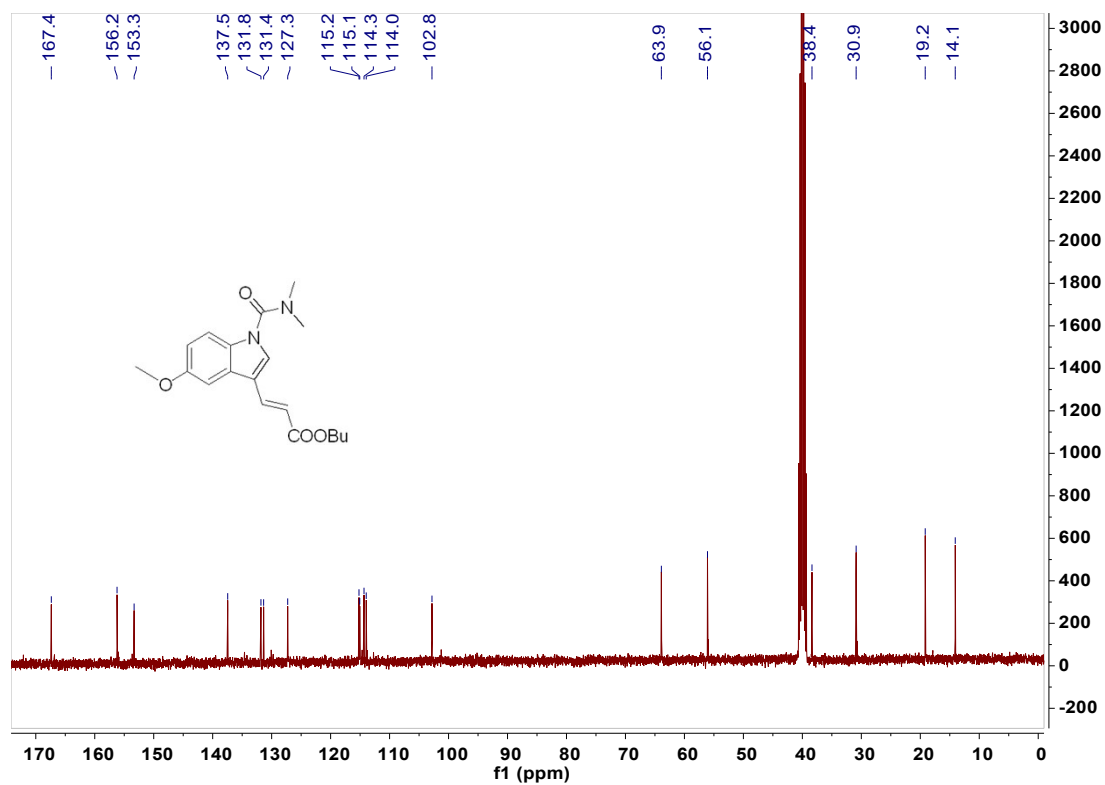

<sup>1</sup>H NMR Spectrum (400 MHz, DMSO-*d*<sub>6</sub>) of **5f**

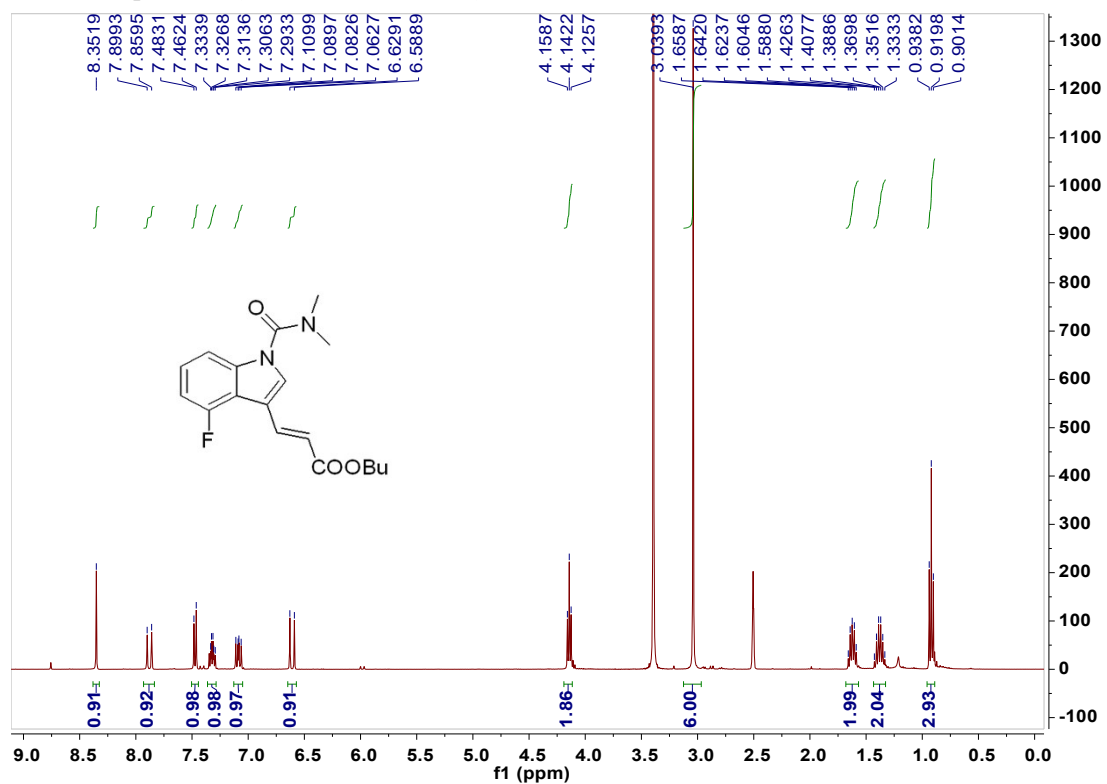

<sup>13</sup>C NMR Spectrum (101 MHz, DMSO-*d*<sub>6</sub>) of **5f**

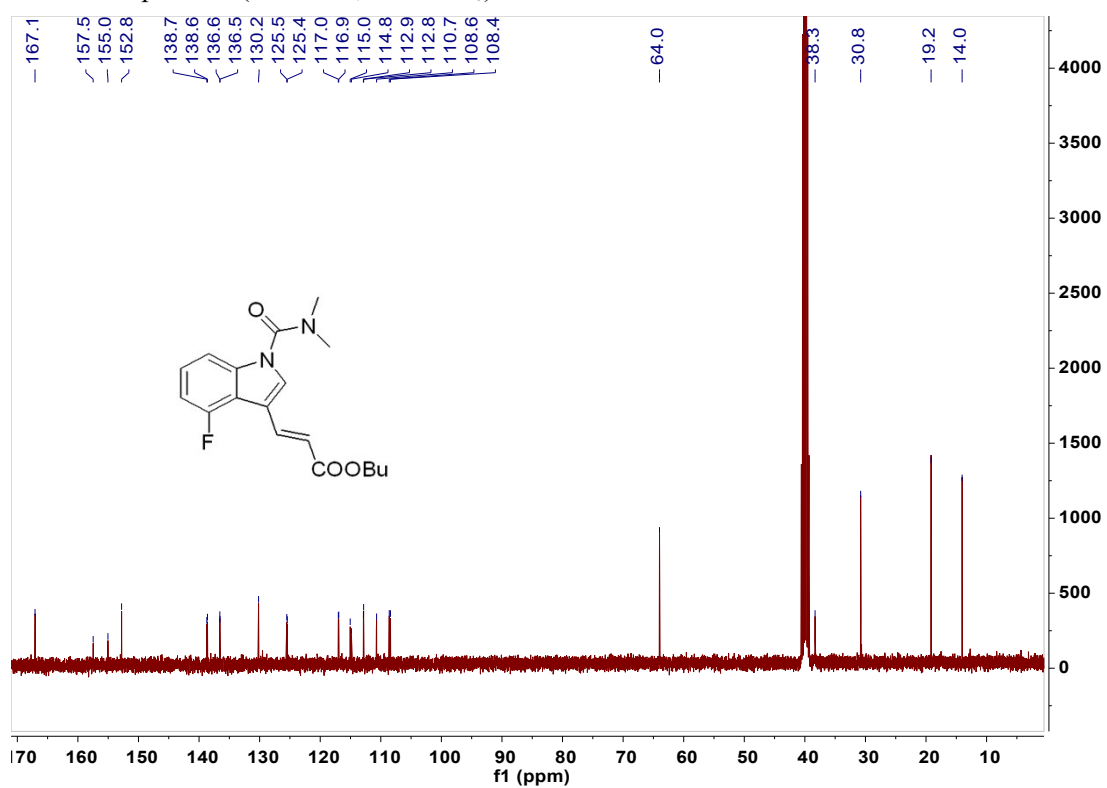

<sup>1</sup>H NMR Spectrum (400 MHz, DMSO-*d*<sub>6</sub>) of **5g**

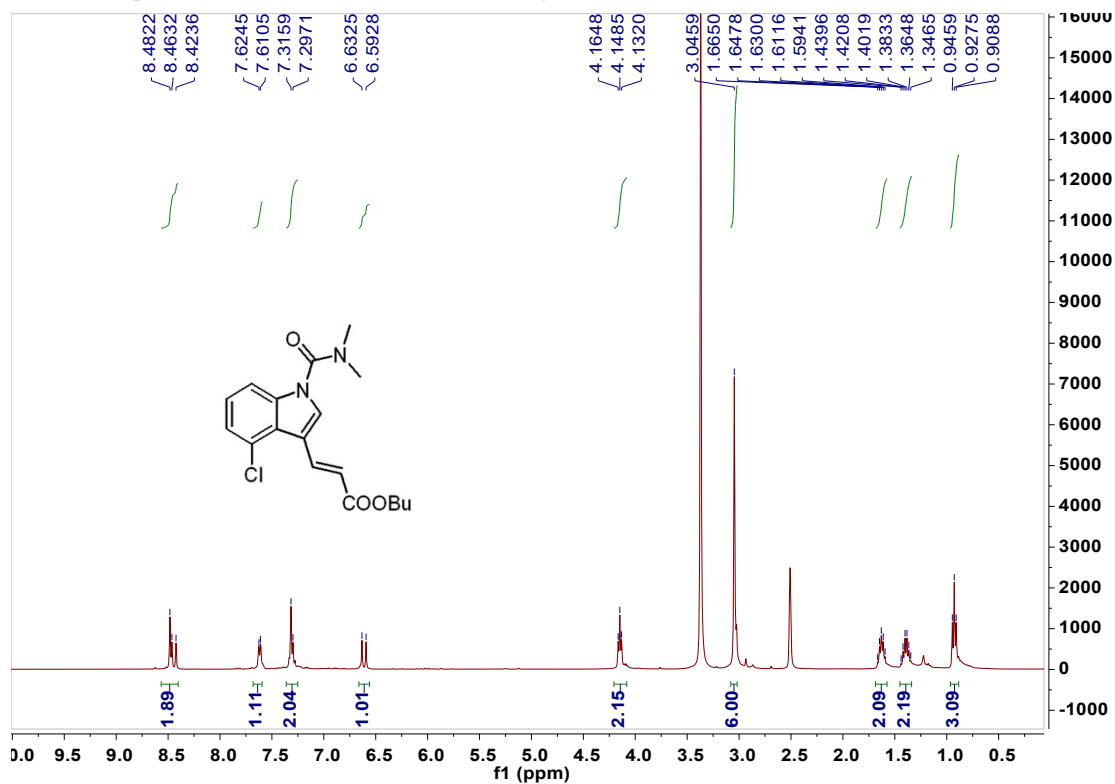

<sup>13</sup>C NMR Spectrum (101 MHz, DMSO-*d*<sub>6</sub>) of **5g**

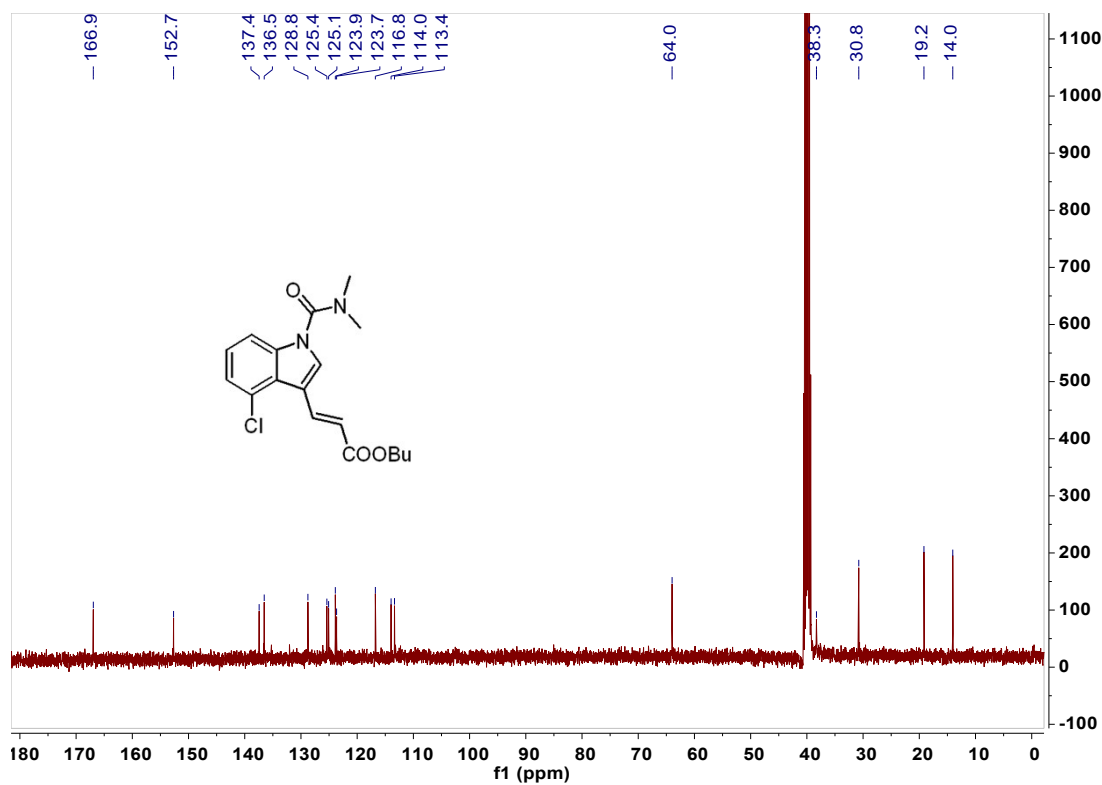

<sup>1</sup>H NMR Spectrum (400 MHz, DMSO-*d*<sub>6</sub>) of **5h**

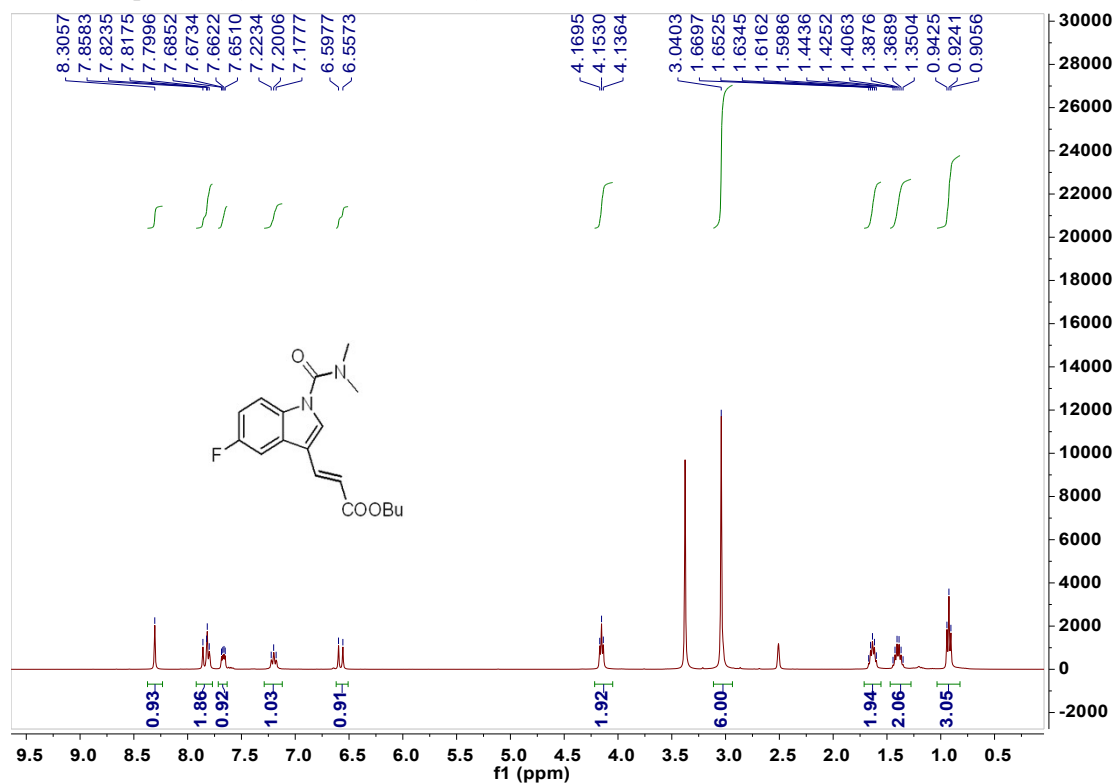

<sup>13</sup>C NMR Spectrum (101 MHz, DMSO-*d*<sub>6</sub>) of **5h**

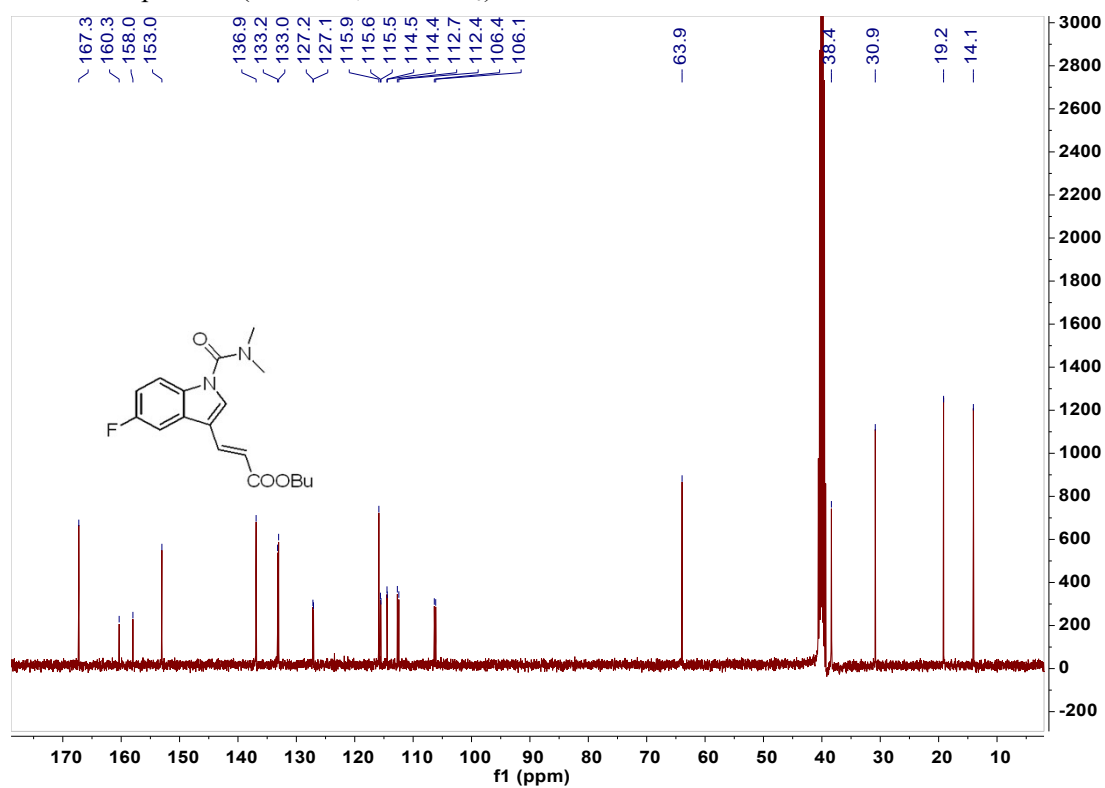



<sup>1</sup>H NMR Spectrum (400 MHz, DMSO-*d*<sub>6</sub>) of **5i**

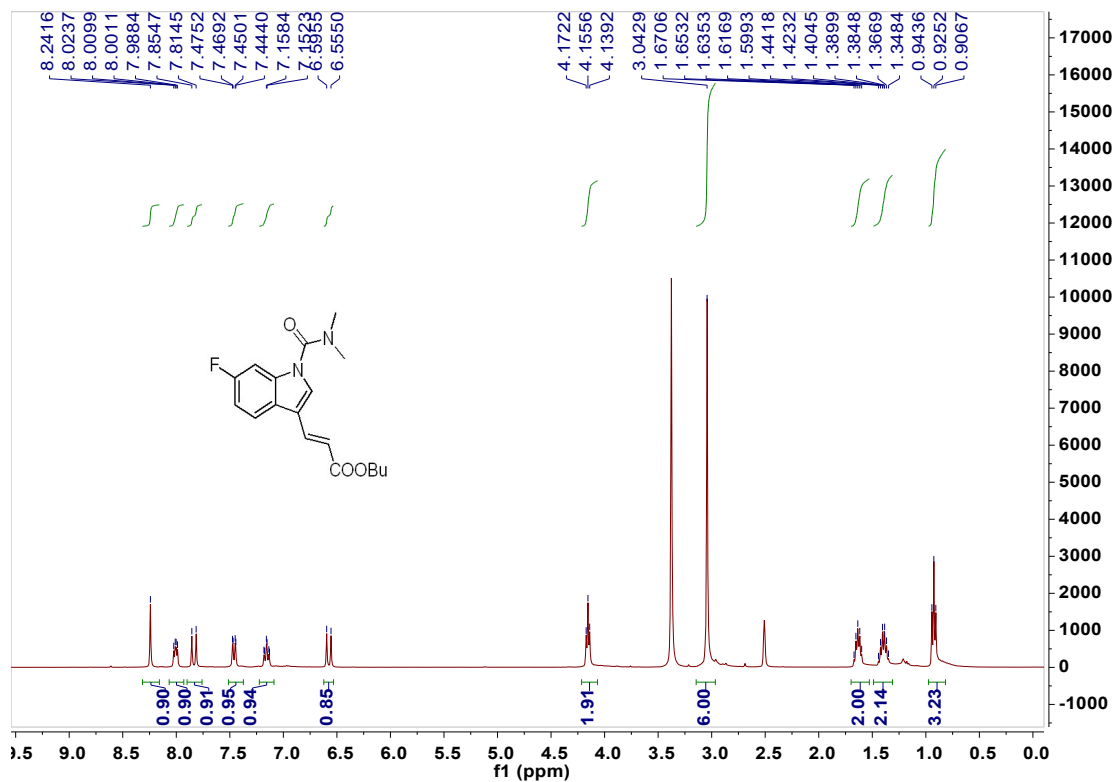

<sup>13</sup>C NMR Spectrum (101 MHz, DMSO-*d*<sub>6</sub>) of **5i**

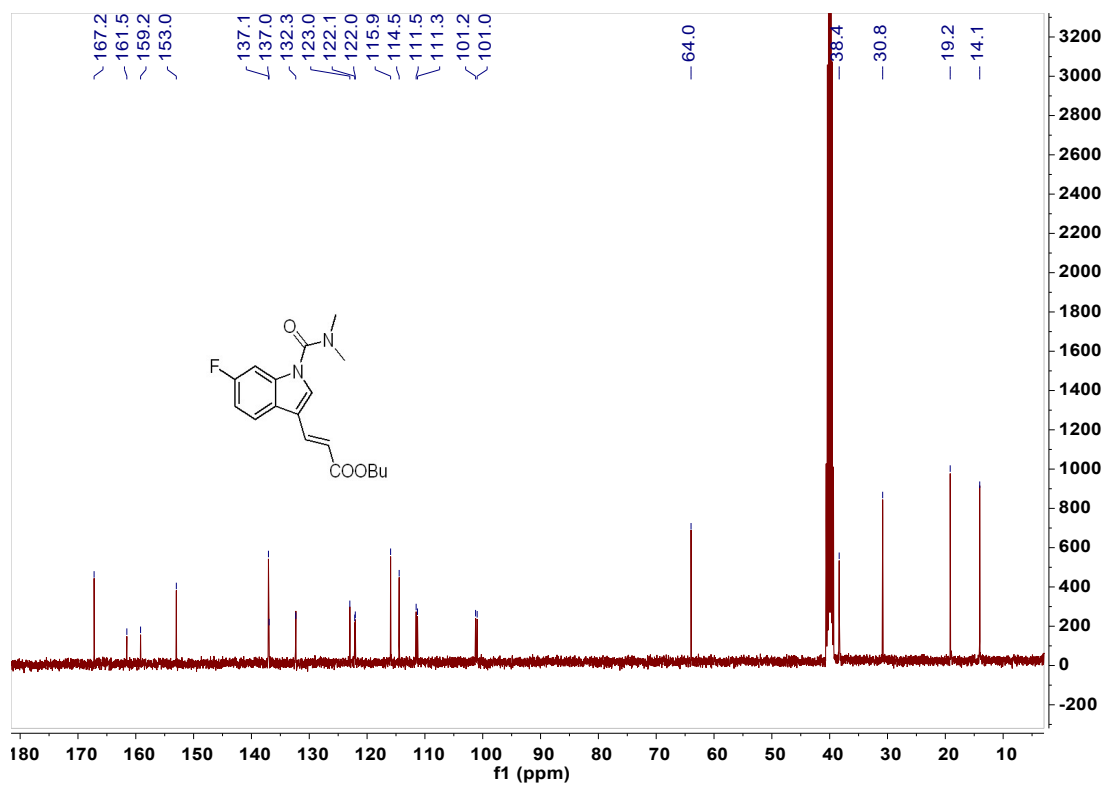

<sup>1</sup>H NMR Spectrum (400 MHz, DMSO-*d*<sub>6</sub>) of **6b**

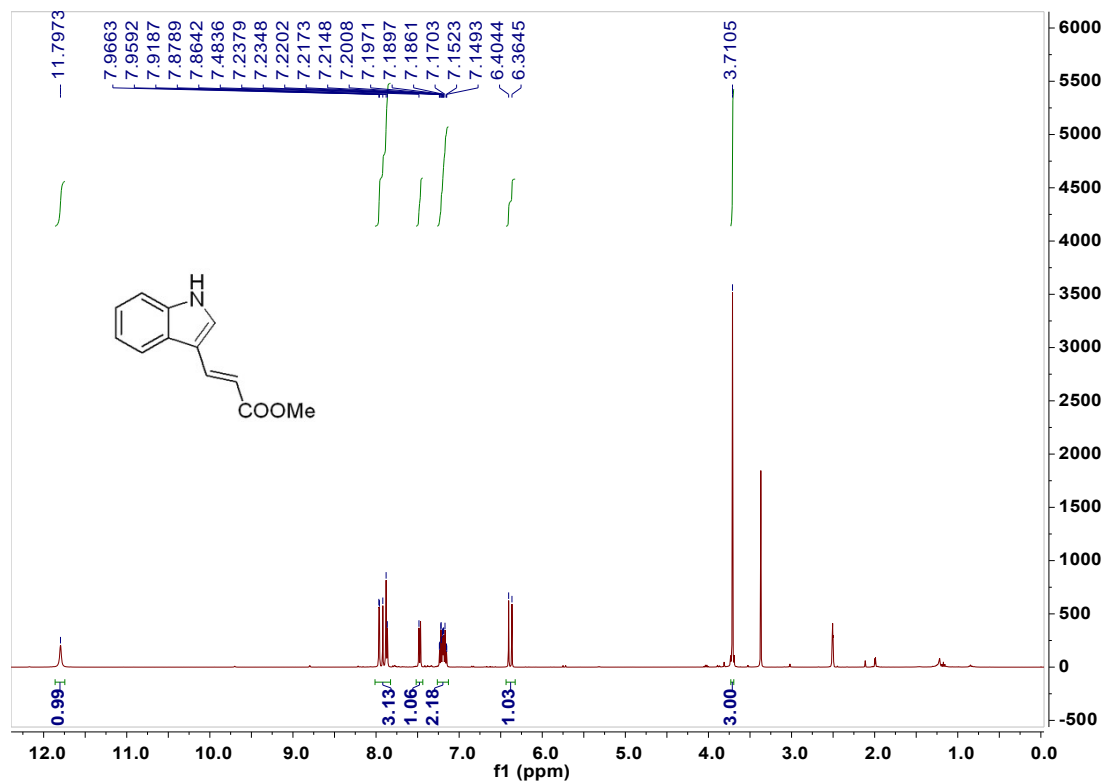

<sup>1</sup>H NMR Spectrum (400 MHz, DMSO-*d*<sub>6</sub>) of **7b**

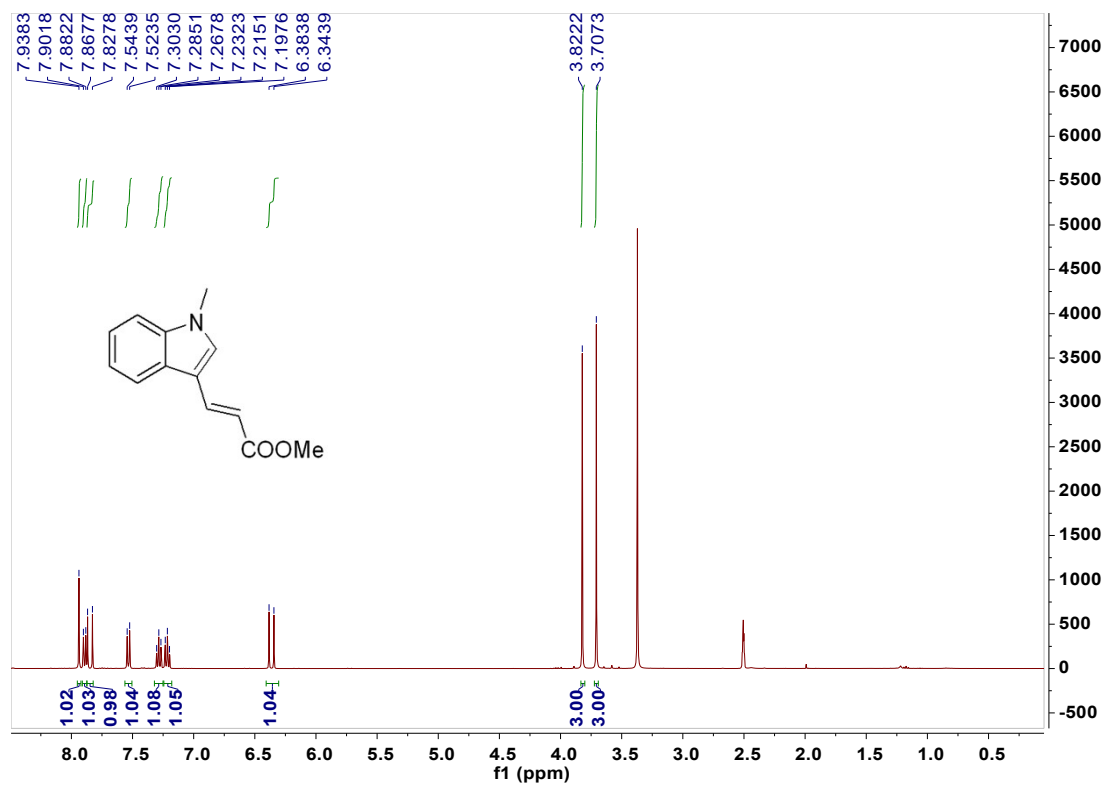

<sup>1</sup>H NMR Spectrum (400 MHz, DMSO-*d*<sub>6</sub>) of **8b**

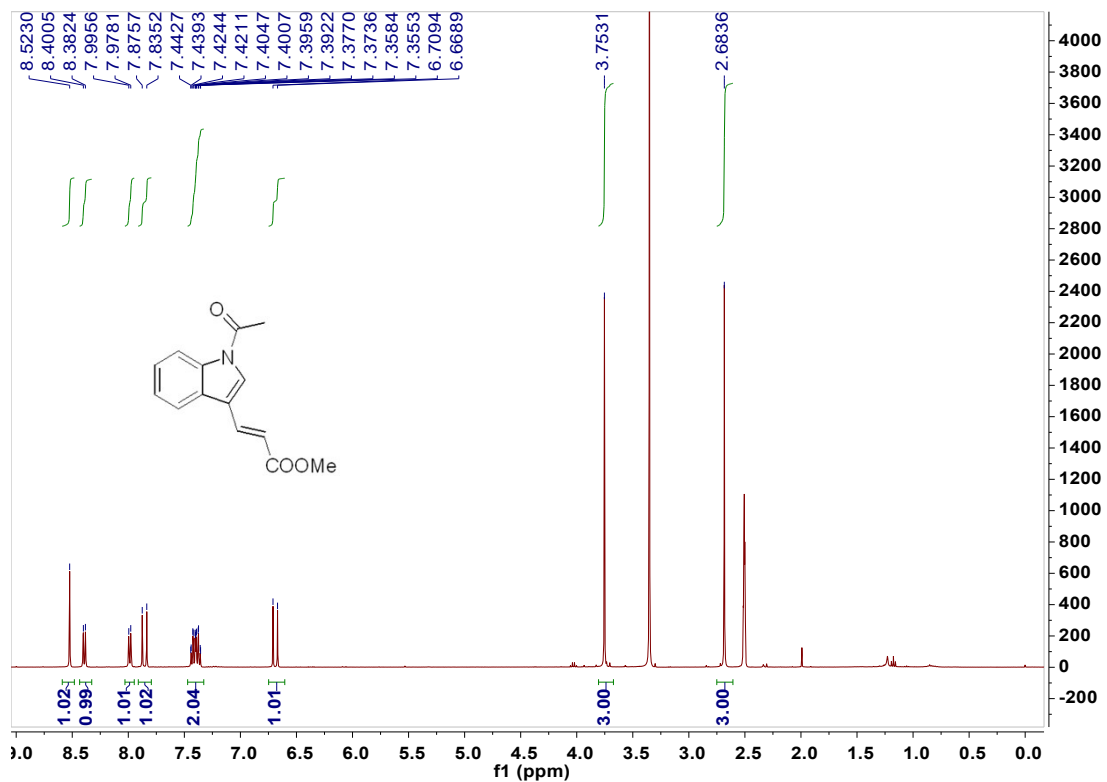

<sup>1</sup>H NMR Spectrum (400 MHz, DMSO-*d*<sub>6</sub>) of **9**

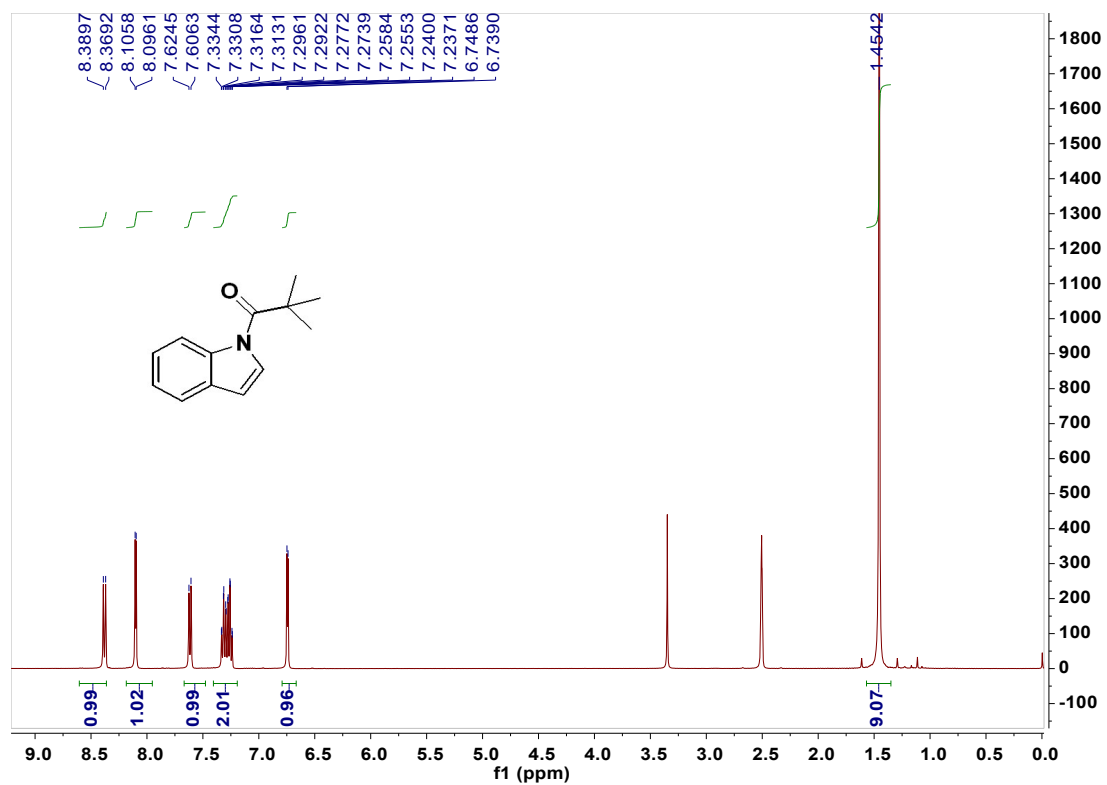

Supplement: d2ob00006g1.pdf [file d2ob00006g1.pdf]
